# Supplementary material for: A derivatisation agent selection guide
Source: Royal Society of Chemistry journal article supplement (doi:10.1039/c7gc03108d), 2017-01-01
Supplement: c7gc03108d1.xlsx [file c7gc03108d1.xlsx]

## Sheet: Original dataset
Derivatization type	Derivatizing reagent	IUAC Name	CAS Number	Molecular formula	MW (g/mol)	Melting point (ºC)	Boiling point (ºC)	Flash point (ºC)	Vapor presure (mm Hg, 25ºC)	LogKOW	LogKOA	LogKAW	LogKOC	LogBCF	Total removal wastewater treatment (%)	Persistence time (h)	Hazard statements (H)	Precautionary statements (P)	Carcinogenicity (IARC)	Signal word	Special hazards arising from the substance or mixture/Hazardous decomposition products	Acute toxicity data	SUBSPORT	SIN List	TRI chemicals list (de minimis % list)
LC	N-(9-acridinyl)maleimide	1-(Acridin-9-yl)-1H-pyrrole-2,5-dione	49759-20-8	C17H10N2O2	274.273	189	508	261.2	2.39e-11	2.77	13.549	-10.779	4.453	1.436	4.15	1710	H315,H319, H335	P261, P305+P351+P338	IARC: No component of this product present at levels greater than or equal to 0.1% is identified as probable, possible or confirmed human carcinogen by IARC.	warning	Carbon oxides, nitrogen oxides (NOx)	no data available	Not in this list	Not in this list	Not in this list
LC	9-anthryldiazomethane	9-(Diazomethyl)anthracene	10401-59-9	C15H10N2	218.45	231.66	540.81		1.5e-11	-1.64	8.655	-10.295	4.061	0.5	1.85	947	H315,H319, H335	P261, P305+P351+P338	IARC: No component of this product present at levels greater than or equal to 0.1% is identified as probable, possible or confirmed human carcinogen by IARC.	warning	Carbon oxides, nitrogen oxides (NOx)	no data available	Not in this list	Not in this list	Not in this list
LC	benzoyl chloride	benzoyl chloride	98-88-4	C6H5COCl	140.57	-1	198	72	0.4	1.44	3.708	-2.268	1.712	0.406	8.07	282	H302, H312, H314, H317, H332	P280, P305+P351+P338, P310	Group 2A: Probably carcinogenic to humans	Danger	Carbon oxides, Hydrogen chloride gas	LD50 Oral - Rat - female - 1.900 mg/kg; LD50 Oral - Rat - male - 3.619 mg/kg; LC50 Inhalation - Rat - 2 h - 1.870 mg/m3	Subsport + Governmental List + NGO or Trade Union List	Not in this list	1
LC	benzoyl bromide	(Bromomethyl)benzene	100-39-0	C7H7Br	171.03	-3	198	87	0.5	2.88	4.473	-1.553	2.714	1.548	26.32	359	H315,H319, H335	P261, P305+P351+P338	IARC: No component of this product present at levels greater than or equal to 0.1% is identified as probable, possible or confirmed human carcinogen by IARC.	warning	Carbon oxides, Hydrogen bromide gas	no data available	Company or sector list	Not in this list	Not in this list
LC	4-bromomethyl-6,7-dimethoxycoumarin	4-(Bromomethyl)-6,7-dimethoxy-2H-chromen-2-one	88404-25-5	C12H11BrO4	299.12	214	417	206	8.72e-07	2.05	8.796	-6.746	2.383	0.877	2.29	1290	H302, H315, H319, H335	P261, P305+P351+P338	IARC: No component of this product present at levels greater than or equal to 0.1% is identified as probable, possible or confirmed human carcinogen by IARC.	warning	Carbon oxides, Hydrogen bromide gas	no data available	Not in this list	Not in this list	Not in this list
LC	4-bromomethyl-7-methoxycoumarin	4-(Bromomethyl)-7-methoxy-2H-chromen-2-one	35231-44-8	C11H9BrO3	269.09	215	385	186.8	5.02e-06	2.48	7.998	-5.518	2.521	1.213	3.04	1040	H302, H315, H319, H335	P261, P305+P351+P338	IARC: No component of this product present at levels greater than or equal to 0.1% is identified as probable, possible or confirmed human carcinogen by IARC.	warning	Carbon oxides, Hydrogen bromide gas	no data available	Not in this list	Not in this list	Not in this list
LC	p-bromophenacyl bromide	2-Bromo-1-(4-bromophenyl)ethanone	99-73-0	C8H6Br2O	277.94	109	310	114	0.000381	2.91	7.645	-4.735	2.16	0.698	5.07	1120	H314	P280, P305+P351+P338, P310	IARC: No component of this product present at levels greater than or equal to 0.1% is identified as probable, possible or confirmed human carcinogen by IARC.	Danger	Carbon oxides, Hydrogen bromide gas	LD50 Oral - Rat - > 2.000 mg/kg	Not in this list	Not in this list	Not in this list
LC	9-(chloromethyl)anthracene	9-(chloromethyl)anthracene	24463-19-2	C15H11Cl	226.7	139	402	185	5.05e-06	5.15	8.237	-3.087	4.823	3.263	81.93	1540	H315,H319, H335	P261, P305+P351+P338	IARC: No component of this product present at levels greater than or equal to 0.1% is identified as probable, possible or confirmed human carcinogen by IARC.	warning	Carbon oxides, Hydrogen chloride gas	no data available	Not in this list	Not in this list	Not in this list
LC	4-chloro-7-nitrobenzo-2-oxa-1,3-diazole	4-Chloro-7-nitro-2,1,3-benzoxadiazole	10199-89-0	C6H2ClN3O3	199.551	98	252.4	155	7.04e-05	2.071	8.016	-5.656	2.323	1.118	2.76	1460	H315,H319	P305, P351, P338	IARC: No component of this product present at levels greater than or equal to 0.1% is identified as probable, possible or confirmed human carcinogen by IARC.	warning	no data available	no data available	Not in this list	Not in this list	Not in this list
LC	dansyl chloride	5-(Dimethylamino)-1-naphthalenesulfonyl chloride	605-65-2	C12H12ClNO2S	269.75	73	371.3	178.4	5.04e-06	4.29	10.545	-6.255	3.681	2.607	44.73	1480	H314	P280, P305 + P351 + P338, P310	IARC: No component of this product present at levels greater than or equal to 0.1% is identified as probable, possible or confirmed human carcinogen by IARC.	Danger	Carbon oxides, nitrogen oxides (NOx), Sulphur oxides, Hydrogen chloride gas	LD50 Intravenous - mouse - 56 mg/kg	Not in this list	Not in this list	Not in this list
LC	dansyl hydrazine	5-(Dimethylamino)-1-naphthalenesulfonohydrazide	33008-06-9	C12H15N3O2S	265.331	128	450.8	226.4	4.76e-08	1.36	11.311	-9.951	3.979	0.348	1.94	1140	H315,H319, H335	P261, P305 + P351 + P338	IARC: No component of this product present at levels greater than or equal to 0.1% is identified as probable, possible or confirmed human carcinogen by IARC.	warning	Carbon oxides, nitrogen oxides (NOx), Sulphur oxides	no data available	Not in this list	Not in this list	Not in this list
LC	9,10-diaminophenanthrene	9,10-Phenanthrenediamine	53348-04-2	C14H12N2	208.258	165	457.6	276.6	1.78e-07	2.51	12.092	-9.582	4.764	1.233	3.12	1650	H315,H319, H335	P261, P305 + P351 + P338	IARC: No component of this product present at levels greater than or equal to 0.1% is identified as probable, possible or confirmed human carcinogen by IARC.	warning	Carbon oxides, nitrogen oxides (NOx)	no data available	Not in this list	Not in this list	Not in this list
LC	p-dimethylamino-phenyl isocyanate	4-Isocyanato-N,N-dimethylaniline	16315-59-6	C9H10N2O	162.189	36	252.5	113	0.142	2.77	6.59	-3.82	2.648	1.433	4.35	970	H302, H312, H315, H319, H332, H335	P261, P280, P305 + P351 + P338	IARC: No component of this product present at levels greater than or equal to 0.1% is identified as probable, possible or confirmed human carcinogen by IARC.	warning	Carbon oxides, nitrogen oxides (NOx)	no data available	Not in this list	Not in this list	Not in this list
LC	5,5-dimethyl-1,3-cyclohexanedione (dimedone)	5,5-Dimethyl-1,3-cyclohexanedione	126-81-8	C8H12O2	140.18	148	165	85	0.00473	1.3	7.152	-5.852	0.518	0.303	1.93	1030	Not a hazardous substance or mixture	Not a hazardous substance or mixture	IARC: No component of this product present at levels greater than or equal to 0.1% is identified as probable, possible or confirmed human carcinogen by IARC.	None	Carbon oxides	LD50 Oral - rat - > 5.000 mg/kg	Not in this list	Not in this list	Not in this list
LC	3,5-dinitrobenzyl chloride	1-(Chloromethyl)-3,5-dinitrobenzene	74367-78-5	C7H5ClN2O4	216.58	80	373.4	179.6	3.45e-05	2.43	8.305	-5.875	2.838	1.171	2.91	2200	H314, H335	P261, P280, P305 + P351 + P338, P310	IARC: No component of this product present at levels greater than or equal to 0.1% is identified as probable, possible or confirmed human carcinogen by IARC.	Danger	Carbon oxides, nitrogen oxides (NOx), Hydrogen chloride gas	no data available	Not in this list	Not in this list	Not in this list
LC	2,4-dinitrophenyl hydrazine	(2,4-Dinitrophenyl)hydrazine	119-26-6	C6H6N4O4	198.14	200	378.6	182.8	8.56e-13	-1.19	19.664	-20.854	2.702	0.5	1.85	973	H228, H302	P210, P301+P312+P330, P301+P312+P330, P370+P378	IARC: No component of this product present at levels greater than or equal to 0.1% is identified as probable, possible or confirmed human carcinogen by IARC.	Danger	Carbon oxides, nitrogen oxides (NOx)	no data available	Not in this list	Not in this list	Not in this list
LC	2-diphenylacetyl-1,3-indandione-1-hydrazone	(3Z)-2-(Diphenylacetyl)-3-hydrazono-1-indanone	5102-79-4	C23H18N2O2	354.4	242	560.4	292.7	7.6e-11	3.743	16.59	-12.97	5.157	1.247	16.06	1850	H301, H410	P273, P301+P310, P501	IARC: No component of this product present at levels greater than or equal to 0.1% is identified as probable, possible or confirmed human carcinogen by IARC.	Danger	Carbon oxides, nitrogen oxides (NOx)	no data available	Not in this list	Not in this list	Not in this list
LC	1-ethoxy-4-(dichloro-s-triazinyl) naphthalene	2,4-Dichloro-6-(4-ethoxy-1-naphthyl)-1,3,5-triazine	21614-17-5	C15H11Cl2N3O	320.18	186.72	549	285.8	1.36e-08	4.369	12.397	-7.797	4.644	2.522	61.17	3080	H302, H318, H413	P280, P305, P351, P338	IARC: No component of this product present at levels greater than or equal to 0.1% is identified as probable, possible or confirmed human carcinogen by IARC.	Danger	Carbon oxides, nitrogen oxides (NOx), Hydrogen chloride gas	no data available	Not in this list	Not in this list	Not in this list
LC	9-fluorenylmethyl chloroformate	9H-Fluoren-9-ylmethyl carbonochloridate	28920-43-6	C15H11ClO2	258.7	63	393.9	143.6	7.58e-06	3.45	6.987	-3.537	4.087	1.959	12.27	8100	H314	P280, P305+P351+P338, P310	IARC: No component of this product present at levels greater than or equal to 0.1% is identified as probable, possible or confirmed human carcinogen by IARC.	Danger	Carbon oxides, Hydrogen chloride gas	no data available	Not in this list	Not in this list	Not in this list
LC	fluorescamine (fluram)	4'-Phenyl-3H,3'H-spiro[2-benzofuran-1,2'-furan]-3,3'-dione	38183-12-9	C17H10O4	278.26	155	550.3	248.5	2.65e-08	2.9	11.644	-8.744	2.238	1.533	4.92	1740	None	None	IARC: No component of this product present at levels greater than or equal to 0.1% is identified as probable, possible or confirmed human carcinogen by IARC.		Carbon oxides	no data available	Not in this list	Not in this list	Not in this list
LC	2-naphthacyl bromide	2-Bromo-1-(2-naphthyl)ethanone	613-54-7	C12H9BrO	249.1	83	349.8	99.1	3.94e-05	3.19	8.537	-5.347	2.996	0.919	7.68	1150	H314, H335	P261, P280, P305+P351+P338, P310	IARC: No component of this product present at levels greater than or equal to 0.1% is identified as probable, possible or confirmed human carcinogen by IARC.	Danger	Carbon oxides, Hydrogen bromide gas	no data available	Not in this list	Not in this list	Not in this list
LC	p-nitrobenzenediazoniumtetrafluoroborate	4-Nitrobenzenediazonium tetrafluoroborate	456-27-9	C6H4BF4N3O2	236.92	146											H302+H312+H332, H314	P280, P305+P351+P338, P310	IARC: No component of this product present at levels greater than or equal to 0.1% is identified as probable, possible or confirmed human carcinogen by IARC.	Danger	Carbon oxides, Nitrogen oxides (NOx), Hydrogen fluoride, Borane/boron oxides	no data available	Not in this list	Not in this list	Not in this list
LC	p-nitrobenzoyl chloride	4-Nitrobenzoyl chloride	122-04-3	C7H4ClNO3	185.56	72	203	102	0.00145	2.17	5.923	-4.673	1.774	0.266	1.95	793	H314	P280, P305+P351+P338, P310	IARC: No component of this product present at levels greater than or equal to 0.1% is identified as probable, possible or confirmed human carcinogen by IARC.	Danger	Carbon oxides, nitrogen oxides (NOx), Hydrogen chloride gas	LD50 Oral - rat - 5.600 mg/kg	Not in this list	Not in this list	Not in this list
LC	p-nitrobenzoyl-N,N'-diisopropylisourea	4-Nitrobenzyl N,N'-diisopropylcarbamimidate	2978-11-2_	C14H21N3O3	279.33	38	368.39	235	5.17e-06	3.43	12.715	-9.285	3.467	1.943	11.53	1830	H301, H311, H331	P261, P280, P301+P310, P311	IARC: No component of this product present at levels greater than or equal to 0.1% is identified as probable, possible or confirmed human carcinogen by IARC.	Danger	Carbon oxides, nitrogen oxides (NOx)	no data available	Not in this list	Not in this list	Not in this list
LC	p-nitrobenzylhydroxylamine hydrochloride	1-[(Aminooxy)methyl]-4-nitrobenzene hydrochloride (1:1)	2086-26-2	C7H8N2O3.HCl	204.61	215											Not a hazardous substance or mixture	Not a hazardous substance or mixture	IARC: No component of this product present at levels greater than or equal to 0.1% is identified as probable, possible or confirmed human carcinogen by IARC.			LD50 Intraperitoneal - mouse - > 800 mg/kg	Not in this list	Not in this list	Not in this list
LC	N-p-nitrobenzyl-N-n-propylamine hydrochloride	N-(4-Nitrobenzyl)-1-propanamine hydrochloride (1:1)	68133-98-2	C10H15ClN2O2	230.69	234											H315, H319, H335	P261, P305+P351+P338	IARC: No component of this product present at levels greater than or equal to 0.1% is identified as probable, possible or confirmed human carcinogen by IARC.	warning	Carbon oxides, nitrogen oxides (NOx), Hydrogen chloride gas	no data available	Not in this list	Not in this list	Not in this list
LC	1-(p-nitro)benzyl-3-p-tolyltriazene	(1E)-3-(4-Methylphenyl)-1-(4-nitrobenzyl)-1-triazene	60259-80-5	C14H14N4O2	270.287	254.26	589.18	207.2	1.02e-15	2.64	20.652	-18.012	3.949	1.335	3.56	1700	H304, H332, H403	P301+P310, P337+P313		warning			Not in this list	Not in this list	Not in this list
LC	p-nitrophenyl chloroformate	4-Nitrophenyl carbonochloridate	7693-46-1	C7H4ClNO4	201.56	78	160	110	0.00103	1.17	5.023	-3.853	2.031	0.201	2.1	659	H314,H315	P261, P305+P351+P338, P310	IARC: No component of this product present at levels greater than or equal to 0.1% is identified as probable, possible or confirmed human carcinogen by IARC.	Danger	Carbon oxides, nitrogen oxides (NOx), Hydrogen chloride gas	no data available	Not in this list	Not in this list	Not in this list
LC	phenacyl bromide	2-Bromo-1-phenylethanone	70-11-1	C8H7BrO	199.04	50	135	113	0.0147	2.19	6.525	-4.335	1.951	0.146	2.64	460	H314	P280, P305+P351+P338, P310	IARC: No component of this product present at levels greater than or equal to 0.1% is identified as probable, possible or confirmed human carcinogen by IARC.	Danger	Carbon oxides, Hydrogen bromide gas	no data available	Not in this list	Not in this list	Not in this list
LC	phenanthreneboronic acid	9-Phenanthrylboronic acid	68572-87-2	C14H11BO2	222.047	167	455.15	243.8	3.22e-11	3.914			5.021	2.415	32.4	1810	H315, H319, H335	P261, P305+P351+P338	IARC: No component of this product present at levels greater than or equal to 0.1% is identified as probable, possible or confirmed human carcinogen by IARC.	warning	Carbon oxides, Borane/boron oxides	no data available	Not in this list	Not in this list	Not in this list
LC	phenyl isocyanate	Isocyanatobenzene	103-71-9	C7H5NO	119.12	-30	162.5	51	1,9 hPa at 20 °C	2.59	4.611	-2.021	2.98	1.297	12.98	382	H226, H302, H314, H317, H330, H334	P260, P280, P284, P305 + P351 + P338, P310	IARC: No component of this product present at levels greater than or equal to 0.1% is identified as probable, possible or confirmed human carcinogen by IARC.	Danger	Carbon oxides, nitrogen oxides (NOx)	LD50 Oral – rat - 800 mg/kg, LC50 Inhalation – rat - 4 h - 22 mg/m3, LD50 Dermal – rabbit - 7.130 mg/kg, LC50 - Danio rerio (zebra fish) - 84 mg/l - 96 h	Company or sector list	Not in this list	Not in this list
LC	o-phthaldialdehyde	Phthalaldehyde	643-79-8	C8H6O2	134.13	55	83	132	0.0149	0.934	7.293	-5.863	1	0.399	1.96	417	H301, H314, H317, H410	P260, P280, P301+P330+P331+P310, P303+P361+P353, P304+P340+P310, P305+P351+P338	IARC: No component of this product present at levels greater than or equal to 0.1% is identified as probable, possible or confirmed human carcinogen by IARC.	Danger	Carbon oxides	LD50 Oral - Rat - 178 mg/kg	Not in this list	Not in this list	Not in this list
LC	pyridoxal hydrochloride	3-Hydroxy-5-(hydroxymethyl)-2-methylisonicotinaldehyde hydrochloride (1:1)	65-22-5	C8H9NO3.HCl	203.62	173											Not a hazardous substance or mixture	Not a hazardous substance or mixture	IARC: No component of this product present at levels greater than or equal to 0.1% is identified as probable, possible or confirmed human carcinogen by IARC.		Carbon oxides, nitrogen oxides (NOx), Hydrogen chloride gas	LD50 Oral - rat - 2.150 mg/kg	Not in this list	Not in this list	Not in this list
LC	sodium diethyldithiocarbamate trihydrate	Carbamodithioic acid, N,N-diethyl-, sodium salt, hydrate (1:1:3)	20624-25-3	C5H10NNaS2.3H2O	225.31	96				-1.43							H302, H400	P301+P312+P330	IARC: No component of this product present at levels greater than or equal to 0.1% is identified as probable, possible or confirmed human carcinogen by IARC.	Warning	Carbon oxides, Nitrogen oxides (NOx), Sulphur oxides, Sodium oxides	LD50 Oral - Rat - 1.500 mg/kg	Not in this list	Not in this list	Not in this list
LC	n-succinimidyl-p-nitrophenylacetate	1-[2-(4-Nitrophenyl)acetoxy]-2,5-pyrrolidinedione	68123-33-1	C12H10N2O6	278.22	181	490.65	234	5.39e-10	-0.61	9.757	-10.367	2.204	0.5	1.85	975	Not a hazardous substance or mixture	Not a hazardous substance or mixture	IARC: No component of this product present at levels greater than or equal to 0.1% is identified as probable, possible or confirmed human carcinogen by IARC.	None	HYDROGEN CHLORIDE, NITROGEN OXIDES, CARBON OXIDES, CARBON MONOXIDE		Not in this list	Not in this list	Not in this list
LC	p-toluenesulfonyl chloride	4-Methylbenzenesulfonyl chloride	98-59-9	C7H7ClO2S	190.65	67	134	128	1	2.447	6.893	-3.403	2.382	1.986	13.25	1090	H315, H318	P305+P351+P338	IARC: No component of this product present at levels greater than or equal to 0.1% is identified as probable, possible or confirmed human carcinogen by IARC.	Danger	Carbon oxides, Sulphur oxides, Hydrogen chloride gas	LD50 Oral - Rat - 4.680 mg/kg	Not in this list	Not in this list	Not in this list
LC	trityl chloride	1,1',1''-(Chloromethanetriyl)tribenzene	76-83-5	C19H15Cl	278.775	110	373.24	177.9	0.000154	5.568	8.505	-3.255	5.843	3.343	84.22	1590	H314	P280, P305+P351+P338, P310	IARC: No component of this product present at levels greater than or equal to 0.1% is identified as probable, possible or confirmed human carcinogen by IARC.	Danger	Carbon oxides, Hydrogen chloride gas	LD50 Intravenous - mouse - 180 mg/kg	Not in this list	Not in this list	Not in this list
LC	N-(4-aminomethylphenyl)pyridinium chloride	1-[4-(Aminomethyl)phenyl]pyridinium chloride	1459205-36-7	C12H13ClN2	220.7												H302, H315, H319, H335	P261, P280, P305+P351+P338	IARC: No component of this product present at levels greater than or equal to 0.1% is identified as probable, possible or confirmed human carcinogen by IARC.	warning	Carbon monoxide, carbon dioxide, nitrogen oxides, and hydrogen chloride.		Not in this list	Not in this list	Not in this list
LC	hydroxylamine hydrochloride	Hydroxylamine hydrochloride (1:1)	5470-11-1_	H3NO.HCl	69.49	156											H290, H302+H312, H315, H317, H319, H351, H373, H400	P260, P280, P301+P312+P330, P305+P351+P338	IARC: No component of this product present at levels greater than or equal to 0.1% is identified as probable, possible or confirmed human carcinogen by IARC.	warning	Nitrogen oxides (NOx), Hydrogen chloride gas	LD50 Oral - Rat - 600 mg/kg	Subsport + Governmental List + NGO or Trade Union List	Not in this list	Not in this list
LC	Fluoro-7-nitro-2,1,3-benzoxadiazole	4-Fluoro-7-nitro-2,1,3-benzoxadiazol	29270-56-2	C6H2FN3O3	183.1	53	308.57	113	0.000442	1.92	7.379	-5.459	2.323	0.776	2.18	1590	H315, H319	P305+P351+P338	IARC: No component of this product present at levels greater than or equal to 0.1% is identified as probable, possible or confirmed human carcinogen by IARC.	warning	Carbon oxides, nitrogen oxides (NOx), Hydrogen fluoride	no data available	Not in this list	Not in this list	Not in this list
LC	diacetyl- l –tartaric acid anhydride	(3R,4R)-2,5-Dioxotetrahydrofuran-3,4-diyl diacetate	6283-74-5	C8H8O7	216.14	132	276.7	158.2	0.00639	-0.26	6.478	-6.738	1	0.5	1.85	575	Not a hazardous substance or mixture	Not a hazardous substance or mixture	IARC: No component of this product present at levels greater than or equal to 0.1% is identified as probable, possible or confirmed human carcinogen by IARC.	None	Carbon oxides	no data available	Not in this list	Not in this list	Not in this list
LC	Lissamine rhodamine B sulfonylchloride	5-(Chlorosulfonyl)-2-[6-(diethylamino)-3-(diethyliminio)-3H-xanthen-9-yl]benzenesulfonate	62796-29-6	C27H29ClN2O6S2	577.11												H315, H319, H335	P261, P305+P351+P338	IARC: No component of this product present at levels greater than or equal to 0.1% is identified as probable, possible or confirmed human carcinogen by IARC.	warning	Carbon oxides, nitrogen oxides (NOx), Sulphur oxides, Hydrogen chloride gas	no data available	Not in this list	Not in this list	Not in this list
LC	(− )-1-(9-fluorenyl) ethyl chloroformate	(1S)-1-(9H-Fluoren-9-yl)ethyl carbonochloridate	107474-79-3	C16H13O2Cl	272.73	119.65	367.57	-17	5.8e-06	3.87	7.284	-3.414	4.305	2.281	24.85	1090	H225, H319, H335	P210, P261, P305 + P351 + P338	IARC: No component of this product present at levels greater than or equal to 0.1% is identified as probable, possible or confirmed human carcinogen by IARC.	Danger	Carbon oxides, Hydrogen chloride gas	no data available	Not in this list	Not in this list	Not in this list
LC	dabsyl chloride	4-{(E)-[4-(Dimethylamino)phenyl]diazenyl}benzenesulfonyl chloride	56512-49-3	C14H14ClN3O2S	323.8	185	483.6	246.3	4.24e-08	5.24	13.049	-7.809	2.913	1	83.98	3690	H314	P280, P305 + P351 + P338, P310	IARC: No component of this product present at levels greater than or equal to 0.1% is identified as probable, possible or confirmed human carcinogen by IARC.	Danger	Carbon oxides, nitrogen oxides (NOx), Sulphur oxides, Hydrogen chloride gas	no data available	Not in this list	Not in this list	Not in this list
LC	Ferrocenecarboxaldehyde	Ferrocenecarboxaldehyde	12093-10-6	C11H10FeO	214.04	118											none	none	IARC: No component of this product present at levels greater than or equal to 0.1% is identified as probable, possible or confirmed human carcinogen by IARC.	none	no data available	no data available	Not in this list	Not in this list	Not in this list
LC	2-Picolylamine	1-(2-Pyridinyl)methanamine	3731-51-9	C6H8N2	108.14	83.5	203	99	0.144	0.43	7.379	-6.949	1.869	0.5	1.86	958	H314	P280, P305 + P351 + P338, P310	IARC: No component of this product present at levels greater than or equal to 0.1% is identified as probable, possible or confirmed human carcinogen by IARC.	Danger	Carbon oxides, nitrogen oxides (NOx)	LD50 Intravenous – Mouse - 340 mg/kg	Not in this list	Not in this list	Not in this list
LC	N,N-Dimethylglycine	N,N-Dimethylglycine	1118-68-9	C4H9NO2	103.12	180	379.39	59.8	3.48	-2.73	3.744	-6.654	0.162	0.5	1.85	506	H302	none	IARC: No component of this product present at levels greater than or equal to 0.1% is identified as probable, possible or confirmed human carcinogen by IARC.	Warning	Carbon oxides, nitrogen oxides (NOx)	LD50 Oral – rat - > 650 mg/kg	Not in this list	Not in this list	Not in this list
LC	Ferroceneboronic acid	Ferroceneboronic acid	12152-94-2	C10H11BFeO2	229.85	150											H315, H319, H335	P261, P305 + P351 + P338	IARC: No component of this product present at levels greater than or equal to 0.1% is identified as probable, possible or confirmed human carcinogen by IARC.	Warning	Carbon oxides, Borane/boron oxides, Iron oxides	no data available	Not in this list	Not in this list	Not in this list
LC	Diethyl ethoxymethylenemalonate	Diethyl (ethoxymethylene)malonate	87-13-8	C10H16O5	216.23	-33	281	144	0.0343	0.95	6.86	-5.91	1	0.5	1.88	476	H302, H315, H319, H335	P261, P305 + P351 + P338	IARC: No component of this product present at levels greater than or equal to 0.1% is identified as probable, possible or confirmed human carcinogen by IARC.	Warning	Carbon oxides	LD50 Oral – Rat - 925 mg/kg	Not in this list	Not in this list	Not in this list
LC	2-Hydrazinopyridine	2-Hydrazinopyridine	4930-98-7	C5H7N3	109.13	47	269	110	0.125	0.25	9.621	-9.371	1.937	0.5	1.85	988	H315, H319, H335	P261, P305 + P351 + P338	IARC: No component of this product present at levels greater than or equal to 0.1% is identified as probable, possible or confirmed human carcinogen by IARC.	Warning	Carbon oxides, Nitrogen oxides (NOx)	no data available	Not in this list	Not in this list	Not in this list
LC	3-Hydroxybenzaldehyde azine	3,3'-[(1E,2E)-1,2-Hydrazinediylidenedi(E)methylylidene]diphenol	18428-76-7	C14H12N2O2	240.26	210	397.11		2.83e-08	2.7	14.288	-10.768	5.269	2.008	13.49	785	H302, H315, H319, H335	P261, P305 + P351 + P338	IARC: No component of this product present at levels greater than or equal to 0.1% is identified as probable, possible or confirmed human carcinogen by IARC.	Warning	Carbon oxides, nitrogen oxides (NOx)	no data available	Not in this list	Not in this list	Not in this list
LC	6-Amino-1-phenalenone	6-Amino-1H-phenalen-1-one	70402-14-1	C13H9NO	195.22	137.25	374.37	208.9	2.56e-06	2.47	11.299	-8.829	3.272	0.362	3.01	1630	H315, H319, H335	P261, P305 + P351 + P338	IARC: No component of this product present at levels greater than or equal to 0.1% is identified as probable, possible or confirmed human carcinogen by IARC.	Warning	Carbon oxides, Nitrogen oxides (Nox)	no data available	Not in this list	Not in this list	Not in this list
LC	3-Amino-9-ethylcarbazole	9-Ethyl-9H-carbazol-3-amine	132-32-1	C14H14N2	210.28	99	355	208.4	1e-05	3.41	10.252	-6.842	3.874	1.928	11.14	1480	H301, H350	P201, P301 + P310, P308 + P313	IARC: No component of this product present at levels greater than or equal to 0.1% is identified as probable, possible or confirmed human carcinogen by IARC.	Danger	Carbon oxides, Nitrogen oxides (NOx)	LD50 Oral – Rat - 144 mg/kg LD50 Intraperitoneal – Mouse - 150 mg/kg	Subsport + Governmental List + NGO or Trade Union List	Classified CMR according to Annex VI of Regulation 1272/2008	Not in this list
LC	Ferrocenoyl azide	Ferrocenecarbonyl azide	1273-85-4	C11H9FeN3O	255.05												none	none	IARC: No component of this product present at levels greater than or equal to 0.1% is identified as probable, possible or confirmed human carcinogen by IARC.	none	Carbon oxides, nitrogen oxides (NOx), Iron oxides	no data available	Not in this list	Not in this list	Not in this list
LC	2-Mercaptoethanol	2-Sulfanylethanol	60-24-2	C2H6OS	78.13	-50	157	74	1.76	-0.056	5.085	-5.285	0.122	0.5	1.85	430	H301 + H331, H310, H315, H317, H318, H373, H410	P261, P273, P280, P301 + P310, P302 + P350, P305 + P351 + P338	IARC: No component of this product present at levels greater than or equal to 0.1% is identified as probable, possible or confirmed human carcinogen by IARC.	Danger	Carbon oxides, Sulphur oxides	LD50 Oral – Rat - 98 - 162 mg/kg ( OECD Test Guideline 401 ) LC50 Inhalation – Rat - 4 h - 2 mg/l LC50 Inhalation – Rat - 4 h - 625 ppm LD50 Dermal – Rabbit - 112 mg/kg LC50 - Leuciscus idus (Golden orfe) - 46 - 100 mg/l - 96,0 h EC50 - Daphnia (water flea) - 0,89 mg/l - 48 h EC50 - Desmodesmus subspicatus (green algae) - 12 mg/l - 72 h LC50 – Bacteria - 125 mg/l - 17 h	Not in this list	Not in this list	Not in this list
LC	4-(1-Methylhydrazino)-7-nitrobenzofurazan	4-(1-Methylhydrazino)-7-nitro-2,1,3-benzoxadiazole	214147-22-5	C7H7N5O3	209.13	160	425.7	211.3	5.2e-06	2.04	12.086	-10.046	2.683	0.871	2.28	1440	H315, H319, H335	P261, P305 + P351 + P338	IARC: No component of this product present at levels greater than or equal to 0.1% is identified as probable, possible or confirmed human carcinogen by IARC.	Warning	Carbon oxides, nitrogen oxides (NOx)	no data available	Not in this list	Not in this list	Not in this list
LC	2-Methoxy-2,4-diphenyl-3(2H)-furanone	2-Methoxy-2,4-diphenyl-3(2H)-furanone	50632-57-0	C17H14O3	266.29	96	426.6	203.6	1.19e-06	3.26	10.566	-7.306	2.046	1.813	8.62	1640	H315, H319, H335	P261, P305 + P351 + P338	IARC: No component of this product present at levels greater than or equal to 0.1% is identified as probable, possible or confirmed human carcinogen by IARC.	Warning	Carbon oxides	no data available	Not in this list	Not in this list	Not in this list
LC	N-Succinimidyl 4-(dimethylamino)benzoate	1-{[4-(Dimethylamino)benzoyl]oxy}-2,5-pyrrolidinedione	58068-85-2	C13H14N2O4	262.26		416.4	205.6		0.36	1.09						none	none	IARC: No component of this product present at levels greater than or equal to 0.1% is identified as probable, possible or confirmed human carcinogen by IARC.	none	Carbon oxides, Nitrogen oxides (NOx)	no data available	Not in this list	Not in this list	Not in this list
LC	3-Ferrocenylpropionic anhydride	1,1′′-[Oxybis(3-oxo-3,1-propanediyl)]bis-ferrocene	132098-76-1	C26H26Fe2O3	498.17												H315, H318	P280, P305 + P351 + P338	IARC: No component of this product present at levels greater than or equal to 0.1% is identified as probable, possible or confirmed human carcinogen by IARC.	Danger	Carbon oxides, Iron oxides	no data available	Not in this list	Not in this list	Not in this list
LC	N-Ferrocenyl-maleimide	N-Ferrocenyl-maleimide	96483-68-0	C14H11FeNO2	281.09												H315, H318	P280, P305 + P351 + P338	IARC: No component of this product present at levels greater than or equal to 0.1% is identified as probable, possible or confirmed human carcinogen by IARC.	Danger	Carbon oxides, Iron oxides, Metal oxides	no data available	Not in this list	Not in this list	Not in this list
LC	4-Nitro-7-piperazinobenzofurazan	4-Nitro-7-(1-piperazinyl)-2,1,3-benzoxadiazole	139332-66-4	C10H11N5O3	249.23	210	475.7	241.5	2.46e-07	2.07	13.274	-11.204	3.194	0.892	2.31	1960	H302, H315, H319, H335	P261, P305 + P351 + P338	IARC: No component of this product present at levels greater than or equal to 0.1% is identified as probable, possible or confirmed human carcinogen by IARC.	Warning	Carbon oxides, nitrogen oxides (NOx)	no data available	Not in this list	Not in this list	Not in this list
LC	4-Bromophenacyl trifluoromethanesulfonate	2-(4-Bromophenyl)-2-oxoethyl trifluoromethanesulfonate	93128-04-2	C9H6BrF3O4S	347.11	133.51	373.9	179.9	5.97e-06	2.97	9.283	-6.313	2.8	0.745	5.44	2590	H314	P280, P305 + P351 + P338, P310	IARC: No component of this product present at levels greater than or equal to 0.1% is identified as probable, possible or confirmed human carcinogen by IARC.	Danger	Carbon oxides, Sulphur oxides, Hydrogen bromide gas, Hydrogen fluoride	no data available	Not in this list	Not in this list	Not in this list
LC	9,10-Dimethoxy-2-anthracenesulfonic acid sodium salt	Sodium 9,10-dimethoxy-2-anthracenesulfonate	67580-39-6	C16H13NaO5S	340.33												H315, H319, H335	P261, P305 + P351 + P338	IARC: No component of this product present at levels greater than or equal to 0.1% is identified as probable, possible or confirmed human carcinogen by IARC.	Warning	Carbon oxides, Sulphur oxides, Sodium oxides	no data available	Not in this list	Not in this list	Not in this list
LC	Ferrocenoyl chloride	1-Chlorocarbonylferrocene	1293-79-4	C11H9ClFeO	248.49												H314,	P280, P305 + P351 + P338, P310	IARC: No component of this product present at levels greater than or equal to 0.1% is identified as probable, possible or confirmed human carcinogen by IARC.	Danger	Carbon oxides, Hydrogen chloride gas, Iron oxides	no data available	Not in this list	Not in this list	Not in this list
LC	1,2-Benzo-3,4-dihydrocarbazole-9-ethyl-p-toluenesulfonate	1,2-Benzo-3,4-dihydrocarbazole-9-ethyl-p-toluenesulfonate	861881-76-7	C25H23NO3S	417.52					6.6							none	none	IARC: No component of this product present at levels greater than or equal to 0.1% is identified as probable, possible or confirmed human carcinogen by IARC.	none	Carbon oxides, nitrogen oxides (NOx), Sulphur oxides	no data available	Not in this list	Not in this list	Not in this list
LC	1-Fluoro-2,4-dinitrobenzene	1-Fluoro-2,4-dinitrobenzene	70-34-8	C6H3FN2O4	186.1	28	178	164		1.16			2.21053	0.934498			H302, H315, H317, H319, H335, H373	P261, P280, P305 + P351 + P338	IARC: No component of this product present at levels greater than or equal to 0.1% is identified as probable, possible or confirmed human carcinogen by IARC.	Warning	Carbon oxides, nitrogen oxides (NOx), Hydrogen fluoride	no data available	Not in this list	Not in this list	Not in this list
LC	2,5-Dioxopyrrolidin-1-yl N-tri(pyrrolidino)phosphoranylideneaminocarbamate	2-(Tri-1-pyrrolidinylphosphoranylidene)hydrazinecarboxylic acid 2,5-dioxo-1-pyrrolidinyl ester	1395920-13-4	C17H29N6O4P	412.42												none	none	IARC: No component of this product present at levels greater than or equal to 0.1% is identified as probable, possible or confirmed human carcinogen by IARC.	none	Carbon oxides, Nitrogen oxides (NOx), Oxides of phosphorus	no data available	Not in this list	Not in this list	Not in this list
LC	3,5-Dinitrobenzoyl chloride	3,5-Dinitrobenzoyl chloride	99-33-2	C7H3ClN2O5	230.56	70	349.53	196	4.66e-05	1.07	8.147	-7.077	1.836	0.125	1.89	1060	H314	P280, P305 + P351 + P338, P310	IARC: No component of this product present at levels greater than or equal to 0.1% is identified as probable, possible or confirmed human carcinogen by IARC.	Danger	Carbon oxides, nitrogen oxides (NOx), Hydrogen chloride gas	no data available	Not in this list	Not in this list	Not in this list
LC	4-[2-(N,N-Dimethylamino)ethylaminosulfonyl]-7-(2-aminoethylamino)-2,1,3-benzoxadiazole	7-[(2-Aminoethyl)amino]-N-[2-(dimethylamino)ethyl]-2,1,3-benzoxadiazole-4-sulfonamide	913253-56-2	C12H20N6O3S	328.39	138.5	528.3	273.3	7.83e-10	-0.11	16.932	-17.042	3.572	0.5	1.85	1180	none	none	IARC: No component of this product present at levels greater than or equal to 0.1% is identified as probable, possible or confirmed human carcinogen by IARC.	none	Carbon oxides, nitrogen oxides (NOx), Sulphur oxides	no data available	Not in this list	Not in this list	Not in this list
LC	4-(Diethylamino)benzhydrazide	4-(Diethylamino)benzohydrazide	100139-54-6	C11H17N3O	207.27	100	382.79		1.17e-06	1.53	12.505	-10.975	2.239	0.482	1.98	1200	H302, H317, H351	P280	IARC: No component of this product present at levels greater than or equal to 0.1% is identified as probable, possible or confirmed human carcinogen by IARC.	Warning	Carbon oxides, nitrogen oxides (NOx)	no data available	Not in this list	Not in this list	Not in this list
LC	4-(Diethylaminomethyl)benzhydrazide	4-[(Diethylamino)methyl]benzohydrazide	62642-61-9	C12H19N3O	221.3	157.35	394.4		5.03e-07	1.11	13.548	-12.438	3.148	0.155	1.9	1080	H302, H317, H351	P280	IARC: No component of this product present at levels greater than or equal to 0.1% is identified as probable, possible or confirmed human carcinogen by IARC.	Warning	Carbon oxides, nitrogen oxides (NOx)	no data available	Not in this list	Not in this list	Not in this list
LC	4-Phenyl-1,2,4-triazoline-3,5-dione	4-Phenyl-3H-1,2,4-triazole-3,5(4H)-dione	4233-33-4	C8H5N3O2	175.15	170	263.8	113.3	5.94e-06	-1.55	3.826	-5.376	2.162	0.5	1.85	429	none	none	IARC: No component of this product present at levels greater than or equal to 0.1% is identified as probable, possible or confirmed human carcinogen by IARC.	none	Carbon oxides, Nitrogen oxides (NOx)	no data available	Not in this list	Not in this list	Not in this list
LC	6-Bromo-3-pyridinylboronic acid	(6-Bromo-3-pyridinyl)boronic acid	223463-14-7	C5H5BBrNO2	201.81	163.5	358.2	170.4	2.49e-07	1.483			2.422	0.374	1.94	1150	none	none	IARC: No component of this product present at levels greater than or equal to 0.1% is identified as probable, possible or confirmed human carcinogen by IARC.	none	Carbon oxides, nitrogen oxides (NOx), Hydrogen bromide gas, Borane/boron oxides	no data available	Not in this list	Not in this list	Not in this list
LC	Dibenzyl ethoxymethylenemalonate	Bis(phenylmethyl) 2-(ethoxymethylidene)propanedioate	56606-21-4	C20H20O5	340.37					4.2							H413	none	IARC: No component of this product present at levels greater than or equal to 0.1% is identified as probable, possible or confirmed human carcinogen by IARC.	none	Carbon oxides	no data available	Not in this list	Not in this list	Not in this list
LC	Fusaric acid	5-Butyl-2-pyridinecarboxylic acid	536-69-6	C10H13NO2	179.22	96.5	329.2	152.9	0.000143	2.71	10.535	-7.825	2.188	0.5	3.86	753	H302	none	IARC: No component of this product present at levels greater than or equal to 0.1% is identified as probable, possible or confirmed human carcinogen by IARC.	Warning	Hazardous decomposition products formed under fire conditions. - Carbon oxides, Nitrogen oxides (NOx)	LD50 Oral - Rat - 480 mg/kg	Not in this list	Not in this list	Not in this list
LC	N-(2-Maleimidoethyl)ferrocenecarboxamide	N-(2-Maleimidoethyl)ferrocenecarboxamide	952102-12-4	C17H16FeN2O3	352.17												H302	none	IARC: No component of this product present at levels greater than or equal to 0.1% is identified as probable, possible or confirmed human carcinogen by IARC.	Warning	Carbon oxides, nitrogen oxides (NOx), Iron oxides	no data available	Not in this list	Not in this list	Not in this list
LC	Phenyl isothiocyanate	Isothiocyanatobenzene	103-72-0	C7H5NS	135.19	-21	218	88	0.125	3.33	4.196	-0.916	1.88	1.826	56.97	312	H301, H314, H317, H334	P261, P280, P301 + P310, P305 + P351 + P338, P310	IARC: No component of this product present at levels greater than or equal to 0.1% is identified as probable, possible or confirmed human carcinogen by IARC.	Danger	Carbon oxides, nitrogen oxides (NOx), Sulphur oxides	LD50 Oral - Mouse - 87 mg/kg; LC50 - Daphnia magna (Water flea)- 0,1 mg/l - 48 h	Not in this list	Not in this list	Not in this list
LC	Benzenesulfonyl chloride	Benzenesulfonyl chloride	98-09-9	C6H5ClO2S	176.62	14	251.5	132	0,05 hPa AT 20 °C	2.94	6.386	-3.446	2.172	1.565	5.67	491	H302, H314, H317, H332, H334,	P261, P280, P305 + P351 + P338, P310	IARC: No component of this product present at levels greater than or equal to 0.1% is identified as probable, possible or confirmed human carcinogen by IARC.	Danger	Carbon oxides, Sulphur oxides, Hydrogen chloride gas	LD50 Oral – rat - 1.960 mg/kg; LC50 - Salmo trutta - 3 mg/l - 48 h	Governmental List	Not in this list	Not in this list
LC	Sodium hexafluorophosphate	Sodium hexafluorophosphate	21324-39-0	NaPF6	167.95	200											H302 + H312 + H332, H314	P280, P305 + P351 + P338, P310	IARC: No component of this product present at levels greater than or equal to 0.1% is identified as probable, possible or confirmed human carcinogen by IARC.	Danger	Hazardous decomposition products formed under fire conditions. - Oxides of phosphorus, Hydrogen fluoride, Sodium oxides	no data available	Not in this list	Not in this list	Not in this list
LC	Glyoxal solution (in 40% of water)	Oxalaldehyde	107-22-2	C2H2O2	58.04	15	104	220	255	-0.671	5.206	-6.866	0	0.5	1.85	567	H315, H317, H319, H332, H341	P280, P305 + P351 + P338	IARC: No component of this product present at levels greater than or equal to 0.1% is identified as probable, possible or confirmed human carcinogen by IARC.	warning	Carbon oxides	LC50 Inhalation – Rat - 4 h - 2,44 mg/l	Subsport + Governmental List + NGO or Trade Union List + Company or Sector List	Not in this list	Not in this list
LC	2,5-Dimethyl-1H-pyrrole-3,4-dicarboxaldehyde	2,5-Dimethyl-1H-pyrrole-3,4-dicarboxaldehyde	56139-74-3	C8H9NO2	151.16	199	297.84	163	0.000606	0.577	9.962	-8.551	1	0.384	1.95	630	H319	P305 + P351 + P338	IARC: No component of this product present at levels greater than or equal to 0.1% is identified as probable, possible or confirmed human carcinogen by IARC.	warning	Carbon oxides, nitrogen oxides (NOx)	no data available	Not in this list	Not in this list	Not in this list
LC	9-Oxo-10(9H)-acridineacetic acid	9-Oxo-10(9H)-acridineacetic acid	38609-97-1	C15H11NO3	253.25	289	486	248.1	4.66e-08	1.49	11.16	-9.67	1.605	0.5	1.97	1190	H315,H319, H335	P261, P305 + P351 + P338	IARC: No component of this product present at levels greater than or equal to 0.1% is identified as probable, possible or confirmed human carcinogen by IARC.	warning	Carbon oxides, nitrogen oxides (NOx)	no data available	Not in this list	Not in this list	Not in this list
LC	N-Acetyl-D-penicillamine	N-Acetyl-3-sulfanyl-D-valine	15537-71-0	C7H13NO3S	191.25	187.5	372.27	191.3	8.74e-07	0.21	11.117	-10.907	1	0.5	1.85	585	H315, H319, H335	P261, P305 + P351 + P338	IARC: No component of this product present at levels greater than or equal to 0.1% is identified as probable, possible or confirmed human carcinogen by IARC.	warning	Carbon oxides, nitrogen oxides (NOx), Sulphur oxides	no data available	Not in this list	Not in this list	Not in this list
LC	meso-1,2-Bis(4-methoxyphenyl)ethylenediamine	(1R,2S)-1,2-Bis(4-methoxyphenyl)-1,2-ethanediamine	58520-45-9	C16H20N2O2	272.34	152.5	388.71	231.9	1.03e-06	1.81	13.826	-12.016	4.221	0.695	2.1	1330	H302, H315, H319, H335	P261, P305 + P351 + P338	IARC: No component of this product present at levels greater than or equal to 0.1% is identified as probable, possible or confirmed human carcinogen by IARC.	warning	Carbon oxides, nitrogen oxides (NOx)	no data available	Not in this list	Not in this list	Not in this list
LC	2,6-Dimethyl-4-quinolinecarboxylic acid N-hydroxysuccinimide ester	1-{[(2,6-Dimethyl-4-quinolinyl)carbonyl]oxy}-2,5-pyrrolidinedione	569355-30-2	C16H14N2O4	298.29		477.5	242.6		1.631			2.133	0.8273			H315, H319, H335	P261, P305 + P351 + P338	IARC: No component of this product present at levels greater than or equal to 0.1% is identified as probable, possible or confirmed human carcinogen by IARC.	warning	Carbon oxides, nitrogen oxides (NOx)	no data available	Not in this list	Not in this list	Not in this list
LC	4-(2-Aminoethylamino)-7-(N,N-dimethylsulfamoyl)benzofurazan	7-[(2-Aminoethyl)amino]-N,N-dimethyl-2,1,3-benzoxadiazole-4-sulfonamide	189373-41-9	C10H5N5O3S	285.32	184.79	440.47	251	1.82e-08	0.4	13.92	-13.52	3.037	0.5	1.86	995	Caution - substance not yet tested completely.	Caution - substance not yet tested completely.	IARC: No component of this product present at levels greater than or equal to 0.1% is identified as probable, possible or confirmed human carcinogen by IARC.	Caution - substance not yet tested completely.	Carbon oxides, nitrogen oxides (NOx), Sulphur oxides	no data available	Not in this list	Not in this list	Not in this list
LC	9-Fluorenylmethyl carbazate	9H-Fluoren-9-ylmethyl hydrazinecarboxylate	35661-51-9	C15H14N2O2	254.28	170	398.02	247.6	5.18e-07	2.44	13.13	-10.69	4.548	1.182	2.94	1630	H315, H319, H335	P261, P305 + P351 + P338	IARC: No component of this product present at levels greater than or equal to 0.1% is identified as probable, possible or confirmed human carcinogen by IARC.	warning	Carbon oxides, nitrogen oxides (NOx)	no data available	Not in this list	Not in this list	Not in this list
LC	1-Dansylpiperazine	N,N-Dimethyl-5-(1-piperazinylsulfonyl)-1-naphthalenamine	86516-36-1	C16H21N3O2S	319.42	132.5	472.9	250.6	1.88e-09	1.6	12.537	-10.767	4.569	0.666	2.08	1310	None	None	IARC: No component of this product present at levels greater than or equal to 0.1% is identified as probable, possible or confirmed human carcinogen by IARC.	warning	Carbon oxides, nitrogen oxides (NOx), Sulphur oxides	no data available	Not in this list	Not in this list	Not in this list
LC	2-Chloro-6-(3-hydroxypropylamino)-1-phenalenone	2-Chloro-6-[(3-hydroxypropyl)amino]-1H-phenalen-1-one	113722-81-9	C16H14ClNO2	287.74	205	448.15	274	1.42e-10	3.03	15.851	-12.821	2.9	0.14	5.95	1780	H315, H319, H335	P261, P305 + P351 + P338	IARC: No component of this product present at levels greater than or equal to 0.1% is identified as probable, possible or confirmed human carcinogen by IARC.	warning	Carbon oxides, nitrogen oxides (NOx), Hydrogen chloride gas	no data available	Not in this list	Not in this list	Not in this list
LC	1 - Naphthyl isocyanate	1-Isocyanatonaphthalene	86-84-0	C11H7NO	169.19	4	267	113	0.00975	3.77	6.802	-3.032	4.034	2.202	21.64	464	H302 + H312 + H332, H315, H319, H334, H335	P261, P280, P305 + P351 + P338, P342 + P311	IARC: No component of this product present at levels greater than or equal to 0.1% is identified as probable, possible or confirmed human carcinogen by IARC.	Danger	Carbon oxides, nitrogen oxides (NOx)	no data available	Not in this list	Not in this list	Not in this list
LC	1 - Naphthyl isothiocyanate	1-Isothiocyanatonaphthalene	551-06-4	C11H7NS	185.24	56	339.3	167.2	0.000284	4.47	6.847	-2.507	2.934	2.642	48.83	470	H301, H312 + H332, H315, H319, H334, H335	P261, P280, P301 + P310, P305 + P351 + P338, P342 + P311	IARC: No component of this product present at levels greater than or equal to 0.1% is identified as probable, possible or confirmed human carcinogen by IARC.	Danger	Carbon oxides, nitrogen oxides (NOx), Sulphur oxides	LD50 Oral – rat - 200 mg/kg	Not in this list	Not in this list	Not in this list
LC	3-(Chlorocarbonyl)-6,7-dimethoxy-1-methyl-2(1H)-quinoxalinone	6,7-Dimethoxy-4-methyl-3-oxo-3,4-dihydro-2-quinoxalinecarbonyl chloride	104077-15-8	C12H11ClN2O4	282.68	174.19	417.78	228.2	8.71e-08	-0.19	9.421	-9.611	1.205	0.5	1.85	978	H314	P280, P303 + P361 + P353, P304 + P340 + P310, P305 + P351 + P338	IARC: No component of this product present at levels greater than or equal to 0.1% is identified as probable, possible or confirmed human carcinogen by IARC.	Danger	Carbon oxides, Nitrogen oxides (NOx), Hydrogen chloride gas	no data available	Not in this list	Not in this list	Not in this list
LC	4,5-Dimethoxy-1,2-phenylenediamine hydrochloride	4,5-Dimethoxy-1,2-benzenediamine dihydrochloride	131076-14-7	C8H12N2O2 2HCl	241.11	265											H315, H319, H335	P261, P305 + P351 + P338	IARC: No component of this product present at levels greater than or equal to 0.1% is identified as probable, possible or confirmed human carcinogen by IARC.	warning	no data available	no data available	Not in this list	Not in this list	Not in this list
LC	4-(7-Diethylaminocoumarin-3-yl)benzoyl cyanide	{4-[7-(Diethylamino)-2-oxo-2H-chromen-3-yl]phenyl}(oxo)acetonitrile	203256-20-6	C21H18N2O3	346.38	227.27	531.41	290.8	2.95e-11	2.65	12.491	-9.841	3.049	1.339	3.6	1450	H302	None	IARC: No component of this product present at levels greater than or equal to 0.1% is identified as probable, possible or confirmed human carcinogen by IARC.	warning	Carbon oxides, nitrogen oxides (NOx)	no data available	Not in this list	Not in this list	Not in this list
LC	1,3-Dinitrobenzene	1,3-Dinitrobenzene	99-65-0	C6H4N2O4	168.11	85	297	150	6.51e-11	-0.57	14.453	-15.023	2.197	0.5	1.85	975	H300 + H310 + H330, H373, H410	P260, P264, P273, P280, P284, P301 + P310	IARC: No component of this product present at levels greater than or equal to 0.1% is identified as probable, possible or confirmed human carcinogen by IARC.	Danger	Carbon oxides, Nitrogen oxides (NOx)	no data available	Governmental List + Company or Sector List	Not in this list	1
LC	4-(Dimethylamino)benzoyl chloride	4-(Dimethylamino)benzoyl chloride	4755-50-4	C9H10ClNO	183.63	147.5	180	122.5	0.0115	1.61	5.678	-4.068	1.381	0.543	2.13	674	H314	P280, P305 + P351 + P338, P310	IARC: No component of this product present at levels greater than or equal to 0.1% is identified as probable, possible or confirmed human carcinogen by IARC.	Danger	Carbon oxides, nitrogen oxides (NOx), Hydrogen chloride gas	no data available	Not in this list	Not in this list	Not in this list
LC	Aminoferrocene	eta5-(1-Aminocyclopentadienyl)(cyclopentadienyl)iron(II)	1273-82-1	C10H11FeN	201.05	157.5											H315, H319	P305 + P351 + P338	IARC: No component of this product present at levels greater than or equal to 0.1% is identified as probable, possible or confirmed human carcinogen by IARC.	warning	no data available	no data available	Not in this list	Not in this list	Not in this list
LC	p-Toluenesulfonyl isocyanate	4-Methylbenzenesulfonyl isocyanate	4083-64-1	C8H7NO3S	197.21	5	276.5	145	9.44e-05	2.436	4.973	-2.633	2.946	1.104	5.57	776	H315, H319, H331, H334, H335	P261, P305 + P351 + P338, P311	IARC: No component of this product present at levels greater than or equal to 0.1% is identified as probable, possible or confirmed human carcinogen by IARC.	Danger	Carbon oxides, Nitrogen oxides (NOx), Sulphur oxides	LD50 Oral – Rat - 2.234 mg/kg LD50 Intraperitoneal – Rat - 775 mg/kg	Subsport + Governmental List	Not in this list	Not in this list
LC	9-fluorenylmethoxycarbonyl chloride	9H-Fluoren-9-ylmethyl carbonochloridate	28020-43-6	C15H11ClO2	258.7	62	393.9	143.6	7.58e-06	3.45	6.987	-3.537	4.087	1.959	12.27	1060	H314	P280, P305+P351+P338, P310	IARC: No component of this product present at levels greater than or equal to 0.1% is identified as probable, possible or confirmed human carcinogen by IARC.	Danger	Carbon oxides, Hydrogen chloride gas	no data available	Not in this list	Not in this list	Not in this list
LC	Benzoin	2-Hydroxy-1,2-diphenylethanone	119-53-9	C14H12O2	212.24	134	344	170	1.26e-05	2.13	7.425	-5.295	1.997	-0.55	2.39	533	none	none	IARC: No component of this product present at levels greater than or equal to 0.1% is identified as probable, possible or confirmed human carcinogen by IARC.	none	Carbon oxides	LD50 Oral - rat - 10.000 mg/kg; LD50 Dermal - rabbit - 8.870 mg/kg	Not in this list	Not in this list	Not in this list
LC	Benzylamine	1-Phenylmethanamine	100-46-9	C7H9N	107.15	-46	184	65	0.757	1.09	5.692	-4.602	2.59	0.139	1.93	268	H302, H312, H314	P280, P305+P351+P338, P310	IARC: No component of this product present at levels greater than or equal to 0.1% is identified as probable, possible or confirmed human carcinogen by IARC.	Danger	Carbon oxides, nitrogen oxides (NOx)	LD50 Oral - rat - 552 mg/kg; LD50 Dermal - rat - 1.350 mg/kg	Not in this list	Not in this list	Not in this list
LC	4-(Dimethylamino)benzaldehyde	4-(Dimethylamino)benzaldehyde	100-10-7	C9H11NO	149.19	73	266.5	164	0.016	1.81	6.868	-5.058	1.182	0.694	2.12	758	none	none	IARC: No component of this product present at levels greater than or equal to 0.1% is identified as probable, possible or confirmed human carcinogen by IARC.	none	Carbon oxides, nitrogen oxides (NOx)	LD50 Oral - rat - > 6.400 mg/kg; LD50 Intraperitoneal - rat - 620 mg/kg	Not in this list	Not in this list	Not in this list
LC	Acetic anhydride	Acetic anhydride	108-24-7	C4H6O3	102.09	-73	139	49	4	-0.27	3.052	-3.632	0	0.5	2.16	372	H226, H302, H314, H330	P210, P260, P280, P304+P340+P310, P305+P351+P338, P370+P378	IARC: No component of this product present at levels greater than or equal to 0.1% is identified as probable, possible or confirmed human carcinogen by IARC.	Danger	Carbon oxides	LD50 Oral - Rat - 630 mg/kg; LC100 Inhalation - Rat - 6 h - 400 ppm; LD50 Dermal - Rabbit - 4.320 mg/kg	Governmental List	Not in this list	Not in this list
LC	ninhydrin	2,2-Dihydroxy-1H-indene-1,3(2H)-dione	485-47-2	C9H6O4	178.14	124.49	351.19	239.7	1.03e-08	1.073	9.53	-8.86	1	0.5	1.87	1010	H302, H315, H319	P301+P312+P330, P305+P351+P338	IARC: No component of this product present at levels greater than or equal to 0.1% is identified as probable, possible or confirmed human carcinogen by IARC.	Warning	Carbon oxides	LD50 Oral - Rat - 600 mg/kg	Not in this list	Not in this list	Not in this list
LC	4-Nitrobenzyl bromide	1-(Bromomethyl)-4-nitrobenzene	100-11-8	C7H6BrNO2	216.03	99	281.73	137.8	0.000977	2.7	6.657	-3.957	2.776	1.38	3.96	1050	H314	P280, P305+P351+P338, P310	IARC: No component of this product present at levels greater than or equal to 0.1% is identified as probable, possible or confirmed human carcinogen by IARC.	Danger	Carbon oxides, nitrogen oxides (NOx), Hydrogen bromide gas	LD50 Intravenous - mouse - 56 mg/kg	Not in this list	Not in this list	Not in this list
LC	4-Nitrophenylhydrazine	(4-Nitrophenyl)hydrazine	100-16-3	C6H7N3O2	153.14	156	453.83	161.8	8.48e-11	-1.59	16.86	-18.45	2.631	0.5	1.85	579	H228, H302, H312, H315, H317, H319, H335	P210, P3261, P280, P305+P351+P338	IARC: No component of this product present at levels greater than or equal to 0.1% is identified as probable, possible or confirmed human carcinogen by IARC.	Warning	Carbon oxides, nitrogen oxides (NOx)	no data available	Not in this list	Not in this list	Not in this list
LC	1-Pyrenebutyric hydrazide	4-(1-Pyrenyl)butanehydrazide	55486-13-0	C20H18N2O	302.37	167	545.27	309.9	1.09e-11	4.1	16.48	-12.38	5.807	2.461	34.83	8190	H302, H312, H315, H319, H332, H335	P261, P280, P305+P351+P338	IARC: No component of this product present at levels greater than or equal to 0.1% is identified as probable, possible or confirmed human carcinogen by IARC.	Warning	Carbon oxides, nitrogen oxides (NOx)	no data available	Not in this list	Not in this list	Not in this list
LC	DiaZald	N,4-Dimethyl-N-nitrosobenzenesulfonamide	80-11-5	C8H10N2O3S	214.24	61	380.38	147.6	2.64e-05	0.58	5.865	-5.245	3.045	0.5	1.87	811	H242, H315, H317, H319, H335	P261, P280, P305+P351+P338	IARC: No component of this product present at levels greater than or equal to 0.1% is identified as probable, possible or confirmed human carcinogen by IARC.	Danger	Diazomethane, Carbon monoxide, Carbon dioxide (CO2), nitrogen oxides (NOx), Sulphur oxides	LD50 Oral - rat - 2.700 mg/kg	Not in this list	Not in this list	Not in this list
LC	4-Methoxybenzoyl chloride	4-Methoxybenzoyl chloride	100-07-2	C8H7ClO2	170.59	22	262	87	0	2.376			2.62564	1.51441			H314	P280, P305+P351+P338, P310	IARC: No component of this product present at levels greater than or equal to 0.1% is identified as probable, possible or confirmed human carcinogen by IARC.	Danger	Carbon oxides, Hydrogen chloride gas	no data available	Not in this list	Not in this list	Not in this list
LC	m-Toluoyl chloride	3-Methylbenzoyl chloride	1711-06-4	C8H7ClO	154.59	-23	220	77	0.134	1.98	4.207	-2.227	1.922	0.828	8.82	331	H314, H335	P261, P280, P305+P351+P338, P310	IARC: No component of this product present at levels greater than or equal to 0.1% is identified as probable, possible or confirmed human carcinogen by IARC.	Danger	Carbon oxides, Hydrogen chloride gas	LD50 Oral - Rat - 3.440 mg/kg	Not in this list	Not in this list	Not in this list
LC	Picrylsulfonic acid solution	2,4,6-trinitrobenzenesulfonic acid	2508-19-2	C6H3N3O9S	293.17	206.87	487.73		5.23e-12	-1.71	12.488	-14.198	1.908	0.5	1.85	1170	H302, H314, H317	P280, P305+P351+P338, P310	IARC: No component of this product present at levels greater than or equal to 0.1% is identified as probable, possible or confirmed human carcinogen by IARC.	Danger	Carbon oxides, Nitrogen oxides (NOx), Sulphur oxides	no data available	Not in this list	Not in this list	Not in this list
LC	4-(4-Isothiocyanatophenylazo)-N,N-dimethylaniline	4-[(E)-(4-Isothiocyanatophenyl)diazenyl]-N,N-dimethylaniline	7612-98-8	C15H14N4S	282.36	170	402.1	235.7	4.56e-07	5.63	11.488	-5.858	2.62	1	89.71	3330	H317, H334	P261, P280, P342+P311	IARC: No component of this product present at levels greater than or equal to 0.1% is identified as probable, possible or confirmed human carcinogen by IARC.	Danger	Carbon oxides, nitrogen oxides (NOx), Sulphur oxides	no data available	Not in this list	Not in this list	Not in this list
LC	N-Methylphthalimide	2-Methyl-1H-isoindole-1,3(2H)-dione	550-44-7	C9H7NO2	161.16	130	371.85	117.4	0.000329	1.31	7.348	-6.038	1.138	0.309	1.93	550	H315, H319, H335	P261, P305+P351+P338	IARC: No component of this product present at levels greater than or equal to 0.1% is identified as probable, possible or confirmed human carcinogen by IARC.	Warning	Carbon oxides, nitrogen oxides (NOx)	no data available	Not in this list	Not in this list	Not in this list
LC	3-Methyl-1-phenyl-2-pyrazoline-5-one	5-Methyl-2-phenyl-2,4-dihydro-3H-pyrazol-3-one	89-25-8	C10H10N2O	174.2	127	330.81	191	3.42e-05	1.1232	7.993	-5.433	2.37	1.273	3.28	569	H302, H315, H319, H335	P261, P305+P351+P338	IARC: No component of this product present at levels greater than or equal to 0.1% is identified as probable, possible or confirmed human carcinogen by IARC.	Warning	Carbon oxides, Nitrogen oxides (NOx)	LD50 Oral - Rat - 1.915 mg/kg	Not in this list	Not in this list	Not in this list
LC	Hydrindantin dihydrate	2,2'-Dihydroxy-1H,1'H-2,2'-biindene-1,1',3,3'(2H,2'H)-tetrone dihydrate	5950-69-6	C18H14O8	358.3	240											none	none	IARC: No component of this product present at levels greater than or equal to 0.1% is identified as probable, possible or confirmed human carcinogen by IARC.	none	Carbon oxides	no data available	Not in this list	Not in this list	Not in this list
LC	4-Isothiocyanato-2,2,6,6-tetramethylpiperidine 1-oxyl	(4-Isothiocyanato-2,2,6,6-tetramethyl-1-piperidinyl)oxidanyl	36410-81-8	C10H17N2OS	213.32	128	360.02		2.65e-07	2.5	9.234	-6.734	2.621	1.222	3.1	1420	H302, H312, H315, H319, H332, H335	P261, P280, P305+P351+P338	IARC: No component of this product present at levels greater than or equal to 0.1% is identified as probable, possible or confirmed human carcinogen by IARC.	Warning	Carbon oxides, nitrogen oxides (NOx), Sulphur oxides	no data available	Not in this list	Not in this list	Not in this list
LC	NIR-797 isothiocyanate	Sodium 4-{2-[(E)-2-{(3E)-3-{(2E)-2-[3,3-dimethyl-1-(4-sulfonatobutyl)-1,3-dihydro-2H-indol-2-ylidene]ethylidene}-2-[(4-isothiocyanatophenyl)sulfanyl]-1-cyclohexen-1-yl}vinyl]-3,3-dimethyl-3H-indolium- 1-yl}-1-butanesulfonate	152111-91-6	C45H50N3NaO6S4	880.14												none	none	IARC: No component of this product present at levels greater than or equal to 0.1% is identified as probable, possible or confirmed human carcinogen by IARC.	none	Carbon oxides, nitrogen oxides (NOx), Sulphur oxides, Sodium oxides, Hydrogen cyanide (hydrocyanic acid)	no data available	Not in this list	Not in this list	Not in this list
LC	3-Bromomethyl-7-methoxy-1,4-benzoxazin-2-one	3-(Bromomethyl)-7-methoxy-2H-1,4-benzoxazin-2-one	124522-09-4	C10H8BrNO3	270.08	146	377.45	181.8	2.35e-06	1.01	5.454	-4.444	2.521	0.079	1.94	610	none	none	IARC: No component of this product present at levels greater than or equal to 0.1% is identified as probable, possible or confirmed human carcinogen by IARC.	none	Carbon oxides, nitrogen oxides (NOx), Hydrogen bromide gas	no data available	Not in this list	Not in this list	Not in this list
LC	7-Fluorobenzofurazane-4-sulfonic acid Ammonium salt	7-Fluoro-2,1,3-benzoxadiazole-4-sulfonic acid ammoniate (1:1)	84806-27-9	C6H6FN3O4S	235.19	290											none	none	IARC: No component of this product present at levels greater than or equal to 0.1% is identified as probable, possible or confirmed human carcinogen by IARC.	none	Carbon oxides, Nitrogen oxides (NOx), Sulphur oxides, Hydrogen fluoride	no data available	Not in this list	Not in this list	Not in this list
LC	Fluorescein isothiocyanate	3',6'-Dihydroxy-5-isothiocyanato-3H-spiro[2-benzofuran-1,9'-xanthen]-3-one	27072-45-3	C21H11NO5S	389.38	258.06	597.33	382.4	2.07e-15	4.69	19.968	-15.278	5.405	2.909	65.52	2060	H334	P261, P342+P311	IARC: No component of this product present at levels greater than or equal to 0.1% is identified as probable, possible or confirmed human carcinogen by IARC.	Danger	Carbon oxides, nitrogen oxides (NOx), Sulphur oxides	no data available	Not in this list	Not in this list	Not in this list
LC	4-Methoxybenzamidine	4-Methoxybenzenecarboximidamide	22265-37-8	C8H10N2O	150.18	120	276.22	108.1	0.00248	0.816	8.181	-7.351	2.64	0.5	1.87	587	H314	P280, P305+P351+P338, P310	IARC: No component of this product present at levels greater than or equal to 0.1% is identified as probable, possible or confirmed human carcinogen by IARC.	Danger	Carbon oxides, nitrogen oxides (NOx)	no data available	Not in this list	Not in this list	Not in this list
LC	4-(6-Methyl-2-benzothiazolyl)-phenylisocyanate	2-(4-Isocyanatophenyl)-6-methyl-1,3-benzothiazole	67229-93-0	C15H10N2OS	266.32	156.09	406.6	207.3	2.62e-07	5.08	12.332	-7.252	5.546	3.212	80.08	2280	none	none	IARC: No component of this product present at levels greater than or equal to 0.1% is identified as probable, possible or confirmed human carcinogen by IARC.	none	Carbon oxides, nitrogen oxides (NOx), Sulphur oxides, Hydrogen cyanide (hydrocyanic acid)	no data available	Not in this list	Not in this list	Not in this list
LC	4,5-Methylenedioxy-1,2-phenylenediamine dihydrochloride	1,3-Benzodioxole-5,6-diamine dihydrochloride	81864-15-5	C7H10Cl2N2O2	225.07	247											H315, H319, H335	P261, P305+P351+P338	IARC: No component of this product present at levels greater than or equal to 0.1% is identified as probable, possible or confirmed human carcinogen by IARC.	Warning	Carbon oxides, Nitrogen oxides (NOx), Hydrogen chloride gas	no data available	Not in this list	Not in this list	Not in this list
LC	Naphthalene-2,3-dicarboxaldehyde	2,3-Naphthalenedicarbaldehyde	7149-49-7	C12H8O2	184.19	132	339.26	142.5	4.18e-05	2.6	9.474	-6.874	1.864	1.305	3.41	662	H315, H319, H335	P261, P305+P351+P338	IARC: No component of this product present at levels greater than or equal to 0.1% is identified as probable, possible or confirmed human carcinogen by IARC.	Warning	Carbon oxides	no data available	Not in this list	Not in this list	Not in this list
LC	1,2-Naphthoquinone-4-sulfonic acid sodium salt	Sodium 3,4-dioxo-3,4-dihydro-1-naphthalenesulfonate	521-24-4	C10H5NaO5S	260.2	289											none	none	IARC: No component of this product present at levels greater than or equal to 0.1% is identified as probable, possible or confirmed human carcinogen by IARC.	none	Carbon oxides, Sulphur oxides, Sodium oxides	no data available	Not in this list	Not in this list	Not in this list
LC	1-Naphthaleneacetic anhydride	1-Naphthylacetic anhydride	5415-58-7	C24H18O3	354.4	117	473.43	276.3	2.92e-09	5.19	12.234	-7.044	5.244	3.296	82.88	1910	H314	P280, P305+P351+P338, P310	IARC: No component of this product present at levels greater than or equal to 0.1% is identified as probable, possible or confirmed human carcinogen by IARC.	Danger	Carbon oxides	no data available	Not in this list	Not in this list	Not in this list
LC	o-Phenylenediamine	1,2-Benzenediamine	95-54-5	C6H8N2	108.14	100	257	136	0.01	0.12	6.681	-6.531	1.869	0.5	1.85	752	H301, H312+H332, H317, H319, H341, H351, H410	P261, P280, P301+P330+P331+P310, P305+P351+P338	IARC: No component of this product present at levels greater than or equal to 0.1% is identified as probable, possible or confirmed human carcinogen by IARC.	Danger	Carbon oxides, Nitrogen oxides (NOx)	LC50 Inhalation - Rat - male - 4 h - 3,6 mg/l	Subsport + Governmental List + NGO or Trade Union List + Company or Sector List	Not in this list	1
LC	Rhodamine B isothiocyanate	9-(2-Carboxy-4-isothiocyanatophenyl)-6-(diethylamino)-N,N-diethyl-3H-xanthen-3-iminium chloride	36877-69-7	C29H30ClN3O3S	536.08												H302, H312, H315, H319, H332, H334, H335	P261, P280, P305+P351+P338, P342+P311	IARC: No component of this product present at levels greater than or equal to 0.1% is identified as probable, possible or confirmed human carcinogen by IARC.	Danger	Carbon oxides, nitrogen oxides (NOx), Sulphur oxides, Hydrogen chloride gas	no data available	Not in this list	Not in this list	Not in this list
LC	2-Methoxy-5-(N-phthalimidinyl) benzenesulfonyl chloride	2-Methoxy-5-(1-oxo-1,3-dihydro-2H-isoindol-2-yl)benzenesulfonyl chloride	126565-42-2	C15H12ClNO4S	337.78	240	493.98	282.9	4.26e-10	3.5	13.942	-10.442	2.516	1.995	13.03	1840	H314	P280, P305+P351+P338, P310	IARC: No component of this product present at levels greater than or equal to 0.1% is identified as probable, possible or confirmed human carcinogen by IARC.	Danger	Carbon oxides, nitrogen oxides (NOx), Sulphur oxides, Hydrogen chloride gas	no data available	Not in this list	Not in this list	Not in this list
LC	4-(N,N-Dimethylsulfamoyl)-7-piperazino-benzofurazan	N,N-Dimethyl-7-(1-piperazinyl)-2,1,3-benzoxadiazole-4-sulfonamide	139332-64-2	C12H17N5O3S	311.36	195.61	463.63	264.3	3.61e-09	1.3	13.521	-12.221	3.338	0.304	1.93	1120	H315, H319, H335	P261, P305+P351+P338	IARC: No component of this product present at levels greater than or equal to 0.1% is identified as probable, possible or confirmed human carcinogen by IARC.	Warning	Carbon oxides, nitrogen oxides (NOx), Sulphur oxides	no data available	Not in this list	Not in this list	Not in this list
LC	4-Fluoro-7-sulfamoylbenzofurazan	7-Fluoro-2,1,3-benzoxadiazole-4-sulfonamide	91366-65-3	C6H4FN3O3S	217.18	144	358.42	201	4.88e-06	0.48	7.641	-7.161	2.214	0.5	1.86	996	none	none	IARC: No component of this product present at levels greater than or equal to 0.1% is identified as probable, possible or confirmed human carcinogen by IARC.	none	Carbon oxides, nitrogen oxides (NOx), Sulphur oxides, Hydrogen fluoride	no data available	Not in this list	Not in this list	Not in this list
LC	1-(2-Naphthoyl)imidazole	1H-Imidazol-1-yl(2-naphthyl)methanone	141903-34-6	C14H10N2O	222.24	76	412.68	219.3	1.9e-07	2.7	8.574	-5.874	2.895	1.378	3.81	1200	H314	P280, P305+P351+P338, P310	IARC: No component of this product present at levels greater than or equal to 0.1% is identified as probable, possible or confirmed human carcinogen by IARC.	Danger	Carbon oxides, nitrogen oxides (NOx)	no data available	Not in this list	Not in this list	Not in this list
LC	Pyridoxal 5’-phosphate monohydrate	(4-Formyl-5-hydroxy-6-methyl-3-pyridinyl)methyl dihydrogen phosphate	41468-25-1	C8H12NO7P	265.16	141	232	110	9.16e-11	0.37	17.792	-17.422	1	0.5	1.86	993	none	none	IARC: No component of this product present at levels greater than or equal to 0.1% is identified as probable, possible or confirmed human carcinogen by IARC.	none	Carbon oxides, nitrogen oxides (NOx), Oxides of phosphorus	LD50 Oral - rat - 5.900 mg/kg	Not in this list	Not in this list	Not in this list
LC	Fluorene-2-carboxaldehyde	9H-Fluorene-2-carbaldehyde	30084-90-3	C14H10O	194.23	84	320.24	232.5	0.000142	3.16	7.683	-4.523	3.131	1.733	7.34	1030	none	none	IARC: No component of this product present at levels greater than or equal to 0.1% is identified as probable, possible or confirmed human carcinogen by IARC.	none	Carbon oxides	no data available	Not in this list	Not in this list	Not in this list
LC	1-Pyrenecarboxaldehyde	1-Pyrenecarbaldehyde	3029-19-4	C17H10O4	230.26	124	412.87	294.6	2.15e-07	4.65	10.722	-6.072	4.146	2.881	63.62	2570	H315, H319, H335	P261, P305+P351+P338	IARC: No component of this product present at levels greater than or equal to 0.1% is identified as probable, possible or confirmed human carcinogen by IARC.	Warning	Carbon oxides	no data available	Not in this list	Not in this list	Not in this list
LC	2-Acetylbenzaldehyde	2-Acetylbenzaldehyde	24257-93-0	C9H8O2	148.16	41	256.16	99.6	0.0135	1.39	7.389	-5.999	1	-0.469	1.95	492	none	none	IARC: No component of this product present at levels greater than or equal to 0.1% is identified as probable, possible or confirmed human carcinogen by IARC.	none	Carbon oxides	no data available	Not in this list	Not in this list	Not in this list
LC	2-Aminopyridine	2(1H)-Pyridinimine	504-29-0	C5H6N2	94.11	56	207	92	0.0975	0.617	7.472	-6.992	1.651	0.5	1.86	975	H301+H311, H315, H319, H335	P261, P280, P301+P310, P305+P351+P338, P312	IARC: No component of this product present at levels greater than or equal to 0.1% is identified as probable, possible or confirmed human carcinogen by IARC.	Danger	Carbon oxides, nitrogen oxides (NOx)	LD50 Oral - rat - 200 mg/kg; LD50 Dermal - guinea pig - 500 mg/kg	Not in this list	Not in this list	Not in this list
LC	Cyanoacetamide	2-Cyanoacetamide	107-91-5	C3H4N2O	84.08	120	351	215	0.000994	-1.758	8.812	-9.722	0.563	0.5	1.85	579	H302, H315, H319, H335	P261, P305+P351+P338	IARC: No component of this product present at levels greater than or equal to 0.1% is identified as probable, possible or confirmed human carcinogen by IARC.	Warning	Carbon oxides, nitrogen oxides (NOx)	LD50 Oral - mouse - 1.680 mg/kg	Not in this list	Not in this list	Not in this list
GC (acylating reagent)	Acetic anhydride	Acetic anhydride	108-24-7	C6H4O3	102.09	-73	139	49	6.5	-0.58	3.052	-3.632	0	0.5	2.16	372	H226, H302, H314, H330	P210, P260, P280, P304 + P340 + P310, P305 + P351 + P338, P370 + P378	IARC: No component of this product present at levels greater than or equal to 0.1% is identified as probable, possible or confirmed human carcinogen by IARC.	Danger	Hazardous decomposition products formed under fire conditions. - Carbon oxides	LD50 Oral – Rat - 630 mg/kg LC100 Inhalation – Rat - 6 h - 400 ppm LD50 Dermal – Rabbit - 4320 mg/kg LC50 - Leuciscus idus melanotus - 265 mg/l - 48 h EC50 - Daphnia (water flea) - 55 mg/l - 96 h EC10 - Desmodesmus subspicatus (green algae) - 3400 mg/l - 192 h	Governmental List	Not in this list	Not in this list
GC (acylating reagent)	Chloracetic anhydride	Chloroacetic anhydride	541-88-8	C4H4Cl2O3	170.98	54	121.5	143	0.3	-0.081			1.66671	0.176091			H301, H314, H317	P280, P301 + P310, P305 + P351 + P338, P310	IARC: No component of this product present at levels greater than or equal to 0.1% is identified as probable, possible or confirmed human carcinogen by IARC.	Danger	Carbon oxides, Hydrogen chloride gas	no data available	Not in this list	Not in this list	Not in this list
GC (acylating reagent)	heptafluoro butyric acid	Heptafluorobutanoic acid	375-22-4	C4HF7O2	214.04	-18	120	0	13	2.43	4.743	-2.313	1.767	0.5	8.42	890	H314	P280, P305 + P351 + P338, P310	IARC: No component of this product present at levels greater than or equal to 0.1% is identified as probable, possible or confirmed human carcinogen by IARC.	Danger	Carbon oxides, Hydrogen fluoride	LD50 Intraperitoneal - Mouse - 112 mg/kg	Company or sector list	Not in this list	Not in this list
GC (acylating reagent)	heptafluorobutyric anhydride	Heptafluorobutanoic anhydride	336-59-4	C8F14O3	410.06	-43	109	18.9	28.3	4.12	2.281	1.839	3.832	2.471	99.87	241	H314	P280, P305 + P351 + P338, P310	IARC: No component of this product present at levels greater than or equal to 0.1% is identified as probable, possible or confirmed human carcinogen by IARC.	Danger	Hazardous decomposition products formed under fire conditions. - Carbon oxides, Hydrogen fluoride	no data available	Not in this list	Not in this list	Not in this list
GC (acylating reagent)	pentafluorobenzaldehyde	Pentafluorobenzaldehyde	653-37-2	C6F5CHO	196.07	26	166	77	1.8	2.63			2.57526	1.44404			H315, H319, H332, H335	P261, P305 + P351 + P338	IARC: No component of this product present at levels greater than or equal to 0.1% is identified as probable, possible or confirmed human carcinogen by IARC.	Warning	Carbon oxides, Hydrogen fluoride	LC50 - Pimephales promelas (fathead minnow) 1.1 mg/l -96 h	Not in this list	Not in this list	Not in this list
GC (acylating reagent)	Pentafluorobenzoyl chloride	Pentafluorobenzoyl chloride	2251-50-5	C7ClF5O	230.52	28.3	158.5	49.7	2.3	2.44	4.374	-1.934	2.813	1.178	14.29	822	H314	P280, P305 + P351 + P338, P310	IARC: No component of this product present at levels greater than or equal to 0.1% is identified as probable, possible or confirmed human carcinogen by IARC.	Danger	Carbon oxides, Hydrogen chloride gas, Hydrogen fluoride	no data available	Not in this list	Not in this list	Not in this list
GC (acylating reagent)	pentafluoropropionic anhydride	pentafluoropropionic anhydride	356-42-3	C6F10O3	310.05	-72.7	69.5	-6.4	116	2.19	1.792	0.398	2.503	0.983	95.96	184	H314	P280, P305 + P351 + P338, P310	IARC: No component of this product present at levels greater than or equal to 0.1% is identified as probable, possible or confirmed human carcinogen by IARC.	Danger	Carbon oxides, Hydrogen fluoride	no data available	Not in this list	Not in this list	Not in this list
GC (acylating reagent)	propionic anhydride	Propanoic anhydride	123-62-6	C6H10O3	130.14	-43	163	63	1.56	0.4	2.99	-2.59	0.458	0.5	5.03	296	H314	P280, P303 + P361 + P353, P304 + P340 + P310, P305 + P351 + P338	IARC: No component of this product present at levels greater than or equal to 0.1% is identified as probable, possible or confirmed human carcinogen by IARC.	Danger	Carbon oxides	LD50 Oral – Rat - 2360 mg/kg LD50 Dermal – Rabbit - 10100 mg/kg	Governmental List + Company or Sector List	Not in this list	Not in this list
GC (acylating reagent)	Pivalic anhydride	2,2-Dimethylpropanoic anhydride	1538-75-6	C10H18O3	186.25	-30.9	193	57	0.511	2.15	4.248	-2.098	1.174	0.953	10.83	512	H226, H314	P280, P305 + P351 + P338, P310	IARC: No component of this product present at levels greater than or equal to 0.1% is identified as probable, possible or confirmed human carcinogen by IARC.	Danger	Carbon oxides	no data available	Not in this list	Not in this list	Not in this list
GC (acylating reagent)	2-thiophene aldehyde	2-Thiophenecarbaldehyde	98-03-3	C5H4OS	112.15	10	198	77	0.419	1.53	4.545	-3.525	1.248	0.085	2.29	345	H302, H315, H319, H335	P280, P301+P312+P330, P305+P351+P338, P337+P313	IARC: No component of this product present at levels greater than or equal to 0.1% is identified as probable, possible or confirmed human carcinogen by IARC.	Warning	Carbon oxides, Sulphur oxides	LD50 Oral - Rat - 915 mg/kg	Not in this list	Not in this list	Not in this list
GC (acylating reagent)	trifluoroacetic anhydride	Trifluoroacetic anhydride	407-25-0	C4F6O3	210.03	-65	40	-26	433 hPa at 20°C	2.56			2.44618	1.26364			H314, H332	P280, P305 + P351 + P338, P310	IARC: No component of this product present at levels greater than or equal to 0.1% is identified as probable, possible or confirmed human carcinogen by IARC.	Danger	Carbon oxides, Hydrogen fluoride	no data available	Not in this list	Not in this list	Not in this list
GC (acylating reagent)	N-trifluoroacetyl imidazole	2,2,2-Trifluoro-1-(1H-imidazol-1-yl)ethanone	1546-79-8	C5H3F3N2O	164.09	40.24	137	44	0.0369	0.15	3.415	-3.265	1.126	0.5	2.58	495	H226, H315, H319, H335	P261, P305 + P351 + P338	IARC: No component of this product present at levels greater than or equal to 0.1% is identified as probable, possible or confirmed human carcinogen by IARC.	Warning	Hazardous decomposition products formed under fire conditions. - Carbon oxides, Nitrogen oxides (NOx), Hydrogen fluoride	no data available	Not in this list	Not in this list	Not in this list
GC (acylating reagent)	pentafluorobenzyl bromide	1-(Bromomethyl)-2,3,4,5,6-pentafluorobenzene	1765-40-8	C7H2F5Br	260.99	19.5	174-175	83	1.26	3.89	5.108	-1.218	3.815	2.292	50.63	2250	H314	P280, P305 + P351 + P338, P310	IARC: No component of this product present at levels greater than or equal to 0.1% is identified as probable, possible or confirmed human carcinogen by IARC.	Danger	Carbon oxides, Hydrogen bromide gas, Hydrogen fluoride	no data available	Not in this list	Not in this list	Not in this list
GC (acylating reagent)	1-(Pentafluoropropionyl)imidazole	2,2,3,3,3-Pentafluoro-1-(1H-imidazol-1-yl)-1-propanone	71735-32-5	C6H3F5N2O	214.09	46.58	240.93	55.2	0.0269	1.12	3.663	-2.543	1.79	0.163	5.4	439	H302, H314	P280, P305 + P351 + P338, P310	IARC: No component of this product present at levels greater than or equal to 0.1% is identified as probable, possible or confirmed human carcinogen by IARC.	Danger	Carbon oxides, nitrogen oxides (NOx), Hydrogen fluoride	no data available	Not in this list	Not in this list	Not in this list
GC (acylating reagent)	2,2,6,6-Tetramethyl-3,5-heptanedione	2,2,6,6-Tetramethyl-3,5-heptanedione	1118-71-4	C11H20O2	184.28	30.96	72.5	67	0.14	2.78	7.906	-5.126	1.078	1.438	4.21	1300	none	none	IARC: No component of this product present at levels greater than or equal to 0.1% is identified as probable, possible or confirmed human carcinogen by IARC.	none	Hazardous decomposition products formed under fire conditions. - Carbon oxides	no data available	Not in this list	Not in this list	Not in this list
GC (acylating reagent)	2-Bromoacetophenone	2-Bromo-1-phenylethanone	70-11-1	C8H7BrO	199.04	49.5	135	113	0.0147	2.19	6.525	-4.335	1.951	0.146	2.64	460	H314	P280, P305 + P351 + P338, P310	IARC: No component of this product present at levels greater than or equal to 0.1% is identified as probable, possible or confirmed human carcinogen by IARC.	Danger	Carbon oxides, Hydrogen bromide gas	no data available	Not in this list	Not in this list	Not in this list
GC (acylating reagent)	pentafluorobenzaldehyde	Pentafluorobenzaldehyde	653-37-2	C6F5CHO	196.07	26	164-168	77	1.8	2.63			2.57526	1.44404			H315, H319, H332, H335	P261, P305 + P351 + P338	IARC: No component of this product present at levels greater than or equal to 0.1% is identified as probable, possible or confirmed human carcinogen by IARC.	Warning	Carbon oxides, Hydrogen fluoride	LC50 - Pimephales promelas (fathead minnow) 1.1 mg/l -96 h	Not in this list	Not in this list	Not in this list
GC (acylating reagent)	Pentafluorobenzoyl Chloride	Pentafluorobenzoyl chloride	2251-50-5	C7ClF5O	230.52	28.3	158	49.7	2.3	2.44	4.374	-1.934	2.813	1.178	14.29	822	H314	P280, P305+P351+P338, P310	IARC: No component of this product present at levels greater than or equal to 0.1% is identified as probable, possible or confirmed human carcinogen by IARC.	Danger	Carbon oxides, Hydrogen chloride gas, Hydrogen fluoride	no data available	Not in this list	Not in this list	Not in this list
GC (acylating reagent)	n-methylbis(trifluoroacetamide)	2,2,2-Trifluoro-N-methyl-N-(trifluoroacetyl)acetamide	685-27-8	C5H3F6NO2	223.02	47.18	121	45	0.0457	1.1	4.595	-3.495	2.054	0.144	2.33	913	H226, H314	P280, P305+P351+P338, P310	IARC: No component of this product present at levels greater than or equal to 0.1% is identified as probable, possible or confirmed human carcinogen by IARC.	Danger	Carbon oxides, nitrogen oxides (NOx), Hydrogen fluoride	no data available	Not in this list	Not in this list	Not in this list
GC (acylating reagent)	N-Methyl-bis-heptafluorobutyramide	2,2,3,3,4,4,4-Heptafluoro-N-(2,2,3,3,4,4,4-heptafluorobutanoyl)-N-methylbutanamide	73980-71-9	C9H3F14NO2	423.1		171.6	57.6		7.59			3.95619	3.37328			H315, H319, H335	P261, P305 + P351 + P338	IARC: No component of this product present at levels greater than or equal to 0.1% is identified as probable, possible or confirmed human carcinogen by IARC.	Warning	Carbon oxides, nitrogen oxides (NOx), Hydrogen fluoride	no data available	Not in this list	Not in this list	Not in this list
GC (alkylation/esterification reagent)	Boron trifluoride	Trifluoroborane	7637-07-2_	BF3	67.81	-127	-100		67500	0.22			1.545	0.5	96.35	145	H280, H314, H330, H335, H373	P260, P280, P303+P361+P353, P304+P340+P310, P305+P351+P338, P403+P233	IARC: No component of this product present at levels greater than or equal to 0.1% is identified as probable, possible or confirmed human carcinogen by IARC.	Danger	Hydrogen fluoride, Borane/boron oxides	LC50 Inhalation - Rat - 4 h - 1.180 mg/m3	Governmental List	Not in this list	1
GC (alkylation/esterification reagent)	Boron trichloride	Trichloroborane	10294-34-5	BCl3	117.17	-107	12.5	30	1170	1.16			1.545	0.193	87.02	147	H280, H300+H330, H314, H335	P260, P280, P284, P304+P340, P305, P351+P338, P403+P233	IARC: No component of this product present at levels greater than or equal to 0.1% is identified as probable, possible or confirmed human carcinogen by IARC.	Danger	Hydrogen chloride gas, Borane/boron oxides	LC50 Inhalation - Rat - 4 h - 945 mg/m3	Governmental List	Not in this list	1
GC (alkylation/esterification reagent)	N,N-dimethylformamide dimethyl acetal	1,1-Dimethoxy-N,N-dimethylmethanamine	4637-24-5	C5H13NO2	119.16	-85	102.5	5	27.8	-0.51	4.179	-4.689	0	0.5	1.88	552	H225, H315, H317, H319, H332, H335	P210, P261, P280, P304 + P340 + P312, P305 + P351 + P338, P370 + P378	IARC: No component of this product present at levels greater than or equal to 0.1% is identified as probable, possible or confirmed human carcinogen by IARC.	Danger	Carbon oxides, Nitrogen oxides (NOx)	LD50 Oral – Rat - > 5.000 mg/kg LC50 Inhalation – Rat - 4 h - 12,6 mg/l LC50 - Leuciscus idus (Golden orfe) - > 10.000 mg/l - 96 h	Not in this list	Not in this list	Not in this list
GC (alkylation/esterification reagent)	2-bromopropane	2-Bromopropane	75-26-3	C3H7Br	122.99	-89	59	19	320 hPa at 20°C	1.9	2.487	-0.347	1.545	0.948	81.24	140	H225, H360F, H373	P201, P210, P308 + P313	IARC: No component of this product present at levels greater than or equal to 0.1% is identified as probable, possible or confirmed human carcinogen by IARC.	Danger	Carbon oxides, Hydrogen bromide gas	LC50 Inhalation – Mouse - 4 h - 31171 ppm LC50 - Carassius auratus (goldfish) - 150 mg/l - 24 h	Subsport + Governmental List + NGO or Trade Union List + Company or Sector List	Classified CMR (Class I & II) according to Annex 1 of Directive 67/548/EEC	Not in this list
GC (alkylation/esterification reagent)	n-butanol	1-Butanol	71-36-3	C4H10O	74.12	-90	117	35	7.78	0.84	4.323	-3.443	0.388	0.5	2.36	239	H226, H302, H315, H318, H335, H336	P210, P280, P301 + P312 + P330, P304 + P340 + P312, P305 + P351 + P338 + P310, P403 + P235	IARC: No component of this product present at levels greater than or equal to 0.1% is identified as probable, possible or confirmed human carcinogen by IARC.	Danger	Flash back possible over considerable distance.	LD50 Oral – Rat - 790 mg/kg Remarks : Liver:Fatty liver degeneration. Kidney, Ureter, ladder: Other changes. Blood:Other changes. LC50 Inhalation – Rat - 4 h - 8000 ppm LD50 Dermal – Rabbit - 3400 mg/kg	Governmental List + NGO or Trade Union List	Not in this list	1
GC (alkylation/esterification reagent)	hydrogen chloride + MeOH	Methanol, hydrochloride (1:1)	132228-87-6	CH5ClO	68.5		64	11	130,3 hPa at 20°C	-0.77							H225, H301 + H311 + H331, H314, H370	P210, P260, P280, P301 + P310 + P330, P303 + P361 + P353, P304 + P340 + P310, P305 + P351 + P338, P308 + P311, P403 + P233	3 - Group 3: Not classifiable as to its carcinogenicity to humans (Hydrogen chloride (press. gas))	Danger	Carbon oxides, Hydrogen chloride gas	no data available	Not in this list	Not in this list	Not in this list
GC (alkylation/esterification reagent)	Sodium methoxide	Sodium methanolate	124-41-4	CH3ONa	54.02	-2	93	33	128 hPa at 25°C								H251, H302, H314	P235 + P410, P280, P305 + P351 + P338, P310	IARC: No component of this product present at levels greater than or equal to 0.1% is identified as probable, possible or confirmed human carcinogen by IARC.	Danger	Carbon oxides, Sodium oxides	LD50 Oral – Rat - 800 mg/kg LD50 Dermal – Rat - > 2000 mg/kg	Governmental List	Not in this list	Not in this list
GC (alkylation/esterification reagent)	Tetramethyl ammonium hydroxide + H2O	N,N,N-Trimethylmethanaminium hydroxide	75-59-2	C4H13NO	91.15	67	102	80	23,33 hPa at 20°C								H300 + H310, H314, H370, H372, H411	P260, P280, P301 + P310 + P330, P303 + P361 + P353, P304 + P340 + P310, P305 + P351 + P338, P308 + P311	IARC: No component of this product present at levels greater than or equal to 0.1% is identified as probable, possible or confirmed human carcinogen by IARC.	Danger	Carbon oxides, Nitrogen oxides (NOx), Hydrogen chloride gas	LD50 Dermal – Rat - 449 mg/kg LD50 Dermal – Rat - 112 mg/kg	Not in this list	Not in this list	Not in this list
GC (alkylation/esterification reagent)	Thionyl chloride	Thionyl dichloride	7719-09-7	SOCl2	118.97	-105	79		119	0.92	4.919	-3.999	0.645	0.5	2.02	404	H302, H314, H331	P260, P280, P303 + P361 + P353, P304 + P340 + P310, P305 + P351 + P338, P403 + P233	IARC: No component of this product present at levels greater than or equal to 0.1% is identified as probable, possible or confirmed human carcinogen by IARC.	Danger	Container explosion may occur under fire conditions. Hazardous decomposition products formed under fire conditions. - Sulphur oxides, Hydrogen chloride gas	LD50 Oral – Rat - 324 mg/kg LC50 Inhalation - Rat - 4 h - 2,72 mg/l	Not in this list	Not in this list	Not in this list
GC (alkylation/esterification reagent)	2,2,2-trichloroethanol	2,2,2-Trichloroethanol	115-20-8	C2H3Cl3O	149.4	17.8	153	110	1.21	1.42	6.615	-5.195	0.466	0.393	1.96	944	H302, H318, H336	P261, P280,P305 + P351 + P338	IARC: No component of this product present at levels greater than or equal to 0.1% is identified as probable, possible or confirmed human carcinogen by IARC.	Danger	Carbon oxides, Hydrogen chloride gas	LDLO Oral - rat - 500 mg/kg	Not in this list	Not in this list	Not in this list
GC (alkylation/esterification reagent)	triethyl orthoformate	(Diethoxymethoxy)ethane	122-51-0	C7H16O3	148.2	-76	146	35	3,9 hPa at 20°C	1.2	5.445	-4.245	1	0.224	1.99	369	H226	P210, P403 + P235	IARC: No component of this product present at levels greater than or equal to 0.1% is identified as probable, possible or confirmed human carcinogen by IARC.	Warning	Carbon oxides	LD50 Oral – Rat - 7.060 mg/kg, LD50 Dermal – Rabbit - 18.000 mg/kg LC50 - Leuciscus idus (Golden orfe) - 592 mg/l - 48 h EC50 - Daphnia magna (Water flea) - 617 mg/l - 48 h	Not in this list	Not in this list	Not in this list
GC (alkylation/esterification reagent)	trimethylphenylammonium hydroxide + MeOH	N,N,N-Trimethylanilinium hydroxide	1899-02-1	C9H15NO	153.22	-98		11	130,3 hPa at 20°C	-0.77							H225, H301, H311, H314, H331, H370	P210, P260, P280, P301 + P310, P305 + P351 + P338, P310	IARC: No component of this product present at levels greater than or equal to 0.1% is identified as probable, possible or confirmed human carcinogen by IARC.	Danger	Carbon oxides, nitrogen oxides (NOx)	no data available	Not in this list	Not in this list	Not in this list
GC (alkylation/esterification reagent)	isobutyl chloroformate	Isobutyl carbonochloridate	543-27-1	C5H9ClO2	136.58	-80	129	36	22,8 hPa at 20°C	1.996	2.188	-0.648	1.351	0.483	68.68	110	H226, H302, H314, H331	P261, P280, P305 + P351 + P338, P310	IARC: No component of this product present at levels greater than or equal to 0.1% is identified as probable, possible or confirmed human carcinogen by IARC.	Danger	Carbon oxides, Hydrogen chloride gas	no data available	Not in this list	Not in this list	Not in this list
GC (alkylation/esterification reagent)	H2SO4 in 10%MeOH	Sulfuric acid solution	7664-93-9	H2O4S	98.08			11									H225, H290, H301 + H311 + H331, H315, H319, H370	P210, P280, P302 + P352 + P312, P304 + P340 + P311, P370 + P378, P403 + P235	IARC: No component of this product present at levels greater than or equal to 0.1% is identified as probable, possible or confirmed human carcinogen by IARC.	Danger	Carbon oxides, Sulphur oxides	no data available	Subsport + Governmental List	Not in this list	1
GC (alkylation/esterification reagent)	butylboronic acid	Butylboronic acid	4426-47-5	C4H11BO2	101.94	91	189.2	68.2	0.000228	1.95			2.362	0.801	2.2	422	none	none	IARC: No component of this product present at levels greater than or equal to 0.1% is identified as probable, possible or confirmed human carcinogen by IARC.	none	Carbon oxides, Borane/boron oxides	no data available	Not in this list	Not in this list	Not in this list
GC (alkylation/esterification reagent)	Ethyl trifluoromethanesulfonate	Ethyl trifluoromethanesulfonate	425-75-2	C3F5F3O3S	178.13	7.23	115	35	19.5	1.49	4.494	-2.764	2.016	0.63	4.25	607	H314	P280, P305 + P351 + P338, P310	IARC: No component of this product present at levels greater than or equal to 0.1% is identified as probable, possible or confirmed human carcinogen by IARC.	Danger	Carbon oxides, Sulphur oxides, Hydrogen fluoride	LC50 - Pimephales promelas (fathead minnow) - 2000 mg/l - 96 h	Not in this list	Not in this list	Not in this list
GC (alkylation/esterification reagent)	Trimethylsulfonium hydroxide solution	Trimethylsulfonium hydroxide	17287-03-5	C3H10OS	94.18			11									H225, H301, H311, H315, H319, H331, H370	P210, P260, P280, P301 + P310, P305 + P351 + P338, P311	IARC: No component of this product present at levels greater than or equal to 0.1% is identified as probable, possible or confirmed human carcinogen by IARC.	Danger	Carbon oxides, Sulphur oxides	no data available	Not in this list	Not in this list	Not in this list
GC (alkylation/esterification reagent)	N,N-Dimethylformamide di-tert-butyl acetal	N,N-Dimethyl-1,1-bis[(2-methyl-2-propanyl)oxy]methanamine	36805-97-7	C11H25NO2	203.32	3.69	76	35	0.469	2.21	6.161	-3.951	1	1.03	2.64	1120	H226, H315, H319, H335	P261, P305 + P351 + P338	IARC: No component of this product present at levels greater than or equal to 0.1% is identified as probable, possible or confirmed human carcinogen by IARC.	Warning	Carbon oxides, nitrogen oxides (NOx)	no data available	Not in this list	Not in this list	Not in this list
GC (alkylation/esterification reagent)	N,N-Dimethylformamide dipropyl acetal	N,N-Dimethyl-1,1-dipropoxymethanamine	6006-65-1	C9H21NO2	175.27	-10.01	67	46	0.47	1.45	5.648	-4.198	1	0.418	2.05	644	H226, H315, H319, H335	P261, P305 + P351 + P338	IARC: No component of this product present at levels greater than or equal to 0.1% is identified as probable, possible or confirmed human carcinogen by IARC.	Warning	Carbon oxides, Nitrogen oxides (NOx)	no data available	Not in this list	Not in this list	Not in this list
GC (alkylation/esterification reagent)	Dimethyl sulfate	Dimethyl sulfate	77-78-1	C2H6O4S	126.13	-32	188	83	0.1	0.16	3.946	-3.786	1.383	0.5	2.07	379	H301, H314, H317, H330, H341, H350	P201, P260, P280, P301 + P310 + P330, P303 + P361 + P353, P304 + P340 + P310, P305 + P351 + P338, P308 + P313, P403 + P233	2A - Group 2A: Probably carcinogenic to humans ( Dimethyl sulphate )	Danger	Carbon oxides, Sulphur oxides	LC50 Inhalation – Rat - 4 h - 45 mg/m3 ; LC50 - Lepomis macrochirus - 7,5 mg/l - 96 h	Subsport + Governmental List + NGO or Trade Union List + Company or Sector List + EU Regulatory List	Classified CMR (Class I & II) according to Annex 1 of Directive 67/548/EEC	0.1
GC (alkylation/esterification reagent)	Trichloroacetyl chloride	Trichloroacetyl chloride	76-02-8	C2Cl4O	181.83	-57	118.5	100	16	0.88	3.805	-2.925	0.989	0.5	3.42	599	H301, H314, H330	P260, P280, P284, P305 + P351 + P338, P310	IARC: No component of this product present at levels greater than or equal to 0.1% is identified as probable, possible or confirmed human carcinogen by IARC.	Danger	Carbon oxides, Hydrogen chloride gas	LD50 Oral - Rat 600 mg/kg LC50 Inhalation – Rat - 4 h - 475 mg/m3	Governmental List	Not in this list	1
GC (alkylation/esterification reagent)	Methyl trifluoromethanesulfonate	Methyl trifluoromethanesulfonate	333-27-7	C2H3F3O3S	164.1	-64	96.5	38	3.66	1.24	4.127	-2.887	1.75	0.252	3.59	547	H226, H314	P280, P305 + P351 + P338, P310	IARC: No component of this product present at levels greater than or equal to 0.1% is identified as probable, possible or confirmed human carcinogen by IARC.	Danger	Carbon oxides, Sulphur oxides, Hydrogen fluoride	no data available	Not in this list	Not in this list	Not in this list
GC (alkylation/esterification reagent)	Hexyl chloroformate	Hexyl carbonochloridate	6092-54-2	C7H13ClO2	164.63	-20.25	60.5	62	0.94	2.59	2.992	-0.402	1.96	1.295	79.38	121	H301 + H311 + H331, H314	P261, P280, P301 + P310, P305 + P351 + P338, P310	IARC: No component of this product present at levels greater than or equal to 0.1% is identified as probable, possible or confirmed human carcinogen by IARC.	Danger	Carbon oxides, Hydrogen chloride gas	no data available	Not in this list	Not in this list	Not in this list
GC (alkylation/esterification reagent)	2,2,3,3,3-Pentafluoro-1-propanol	2,2,3,3,3-Pentafluoro-1-propanol	422-05-9	C3H3F5O	150.05	-82.11	81	11.6	50.3	1.24	4.27	-3.04	1.13	0.247	3.11	575	H302, H315, H319, H335	P261, P305 + P351 + P338	IARC: No component of this product present at levels greater than or equal to 0.1% is identified as probable, possible or confirmed human carcinogen by IARC.	Warning	Carbon oxides, Hydrogen fluoride	no data available	Not in this list	Not in this list	Not in this list
GC (alkylation/esterification reagent)	N,N-Dimethylformamide diethyl acetal	1,1-Diethoxy-N,N-dimethylmethanamine	1188-33-6	C7H17NO2	147.22	-33.57	129	28	10.5	0.47	4.913	-4.443	1	0.47	1.91	558	H226	P210, P370 +P378	IARC: No component of this product present at levels greater than or equal to 0.1% is identified as probable, possible or confirmed human carcinogen by IARC.	Warning	Hazardous decomposition products formed under fire conditions. - Carbon oxides, Nitrogen oxides (NOx)	no data available	Not in this list	Not in this list	Not in this list
GC (alkylation/esterification reagent)	pentafluorobenzyl bromide	1-(Bromomethyl)-2,3,4,5,6-pentafluorobenzene	1765-40-8	C7H2BrF5	260.99	19.5	174.5	83	1.26	3.89	5.108	-1.218	3.815	2.292	50.63	2250	H314	P280, P305 + P351 + P338, P310	IARC: No component of this product present at levels greater than or equal to 0.1% is identified as probable, possible or confirmed human carcinogen by IARC.	Danger	Carbon oxides, Hydrogen bromide gas, Hydrogen fluoride	no data available	Not in this list	Not in this list	Not in this list
GC (alkylation/esterification reagent)	pentafluorobenzyl chloride	1-(Chloromethyl)-2,3,4,5,6-pentafluorobenzene	653-35-0	C7H2ClF5	216.536	-1.48	72	55.3	2.53	2.672	4.532	-0.732	3.815	2.223	96.8	262	H314-H302-H312-H332	P260-P303+P361+P353-P305+P351+P338-P301+P330+P331-P405-P501a					Not in this list	Not in this list	Not in this list
GC (alkylation/esterification reagent)	pentafluorobenzyl hydroxylamine hydrochloride	1-[(Aminooxy)methyl]-2,3,4,5,6-pentafluorobenzene hydrochloride (1:1)	57981-02-9	C7H4F5NO · HCl	249.57	215											none	none	IARC: No component of this product present at levels greater than or equal to 0.1% is identified as probable, possible or confirmed human carcinogen by IARC.	none	Carbon oxides, Nitrogen oxides (NOx), Hydrogen chloride gas, Hydrogen fluoride	no data available	Not in this list	Not in this list	Not in this list
GC (alkylation/esterification reagent)	pentafluorophenyl hydrazine	(Pentafluorophenyl)hydrazine	828-73-9	C₆H₃F₅N₂	198.09	76	177.76	24.9	0.328	2.525	7.953	-6.153	3.038	0.683	2.1	2410	H315, H319, H335	P261, P305 + P351 + P338	IARC: No component of this product present at levels greater than or equal to 0.1% is identified as probable, possible or confirmed human carcinogen by IARC.	Warning	Carbon oxides, nitrogen oxides (NOx), Hydrogen fluoride	LD50 intravenous-mouse- 180 mg/Kg	Not in this list	Not in this list	Not in this list
GC (alkylation/esterification reagent)	1,1,1,3,3,3-Hexafluoro-2-propanol	1,1,1,3,3,3-Hexafluoro-2-propanol	920-66-1	C3H2F6O	168.04	-4	59	4	115	1.66	4.42	-2.76	1.313	0.578	423	701	H302, H314, H361	P260, P280, P301+P312+P330, P303+P361+P353, P304+P340+P310, P305+P351+P338	IARC: No component of this product present at levels greater than or equal to 0.1% is identified as probable, possible or confirmed human carcinogen by IARC.	Danger	Carbon oxides, Hydrogen fluoride	LD50 Oral - Rat - 1.500 mg/kg; LC50 Inhalation - Rat - 4 h - 1.974 mg/l	Not in this list	Not in this list	Not in this list
GC (alkylation/esterification reagent)	2,3,5,6-Tetrafluoro-4-ethanol (trifluoromethyl)benzyl bromide	1-(Bromomethyl)-2,3,5,6-tetrafluoro-4-(trifluoromethyl)benzene	76437-40-6	C8H2BrO7	310.99	27.62	182.86	99	0.38	4.65	4.997	-0.347	4.459	2.879	88.56	2190	H314	P280, P305+P351+P338, P310	IARC: No component of this product present at levels greater than or equal to 0.1% is identified as probable, possible or confirmed human carcinogen by IARC.	Danger	Carbon oxides, Hydrogen bromide gas, Hydrogen fluoride	no data available	Not in this list	Not in this list	Not in this list
GC (alkylation/esterification reagent)	Pentafluoroiodoethane	1,1,1,2,2-Pentafluoro-2-iodoethane	354-64-3	C2F5I	245.92	-92	12	-10.9	1150	2.97	1.101	1.869	2.352	1.589	99.86	174	H280, H315, H319, H335	P261, P305+P351+P338, P410+P403	IARC: No component of this product present at levels greater than or equal to 0.1% is identified as probable, possible or confirmed human carcinogen by IARC.	Warning	Carbon oxides, Hydrogen fluoride, Hydrogen iodide	no data available	Not in this list	Not in this list	Not in this list
GC (alkylation/esterification reagent)	Tetrabutylammonium tetrabutylborate	N,N,N-Tributyl-1-butanaminium tetrabutylborate(1-)	23231-91-6	C32H72BN	481.73	106											H315, H319, H335	P261, P305+P351+P338	IARC: No component of this product present at levels greater than or equal to 0.1% is identified as probable, possible or confirmed human carcinogen by IARC.	Warning	Carbon oxides, nitrogen oxides (NOx), Borane/boron oxides	no data available	Not in this list	Not in this list	Not in this list
GC (alkylation/esterification reagent)	Trimethylboroxine	Trimethylboroxin	823-96-1	C3H9B3O3	125.53	-38	79	-9	45	-1.9			2.847	0.5	2.26	361	H225, H314	P210, P280, P305+P351+P338, P310	IARC: No component of this product present at levels greater than or equal to 0.1% is identified as probable, possible or confirmed human carcinogen by IARC.	Danger	Carbon oxides, Borane/boron oxides	no data available	Not in this list	Not in this list	Not in this list
GC (alkylation/esterification reagent)	4-bromobenzyl bromide		589-15-1	C7H6Br2	249.93	63	245.69	122.5	0.0147	3.77	5.722	-1.952	2.924	2.206	28.84	982	H314,H334	P261, P280, P305 + P351 + P338, P310	IARC: No component of this product present at levels greater than or equal to 0.1% is identified as probable, possible or confirmed human carcinogen by IARC.	Danger	Carbon oxides, Hydrogen bromide gas	no data available	Not in this list	Not in this list	Not in this list
GC (alkylation/esterification reagent)	Ethoxyamine hydrochloride	(Aminooxy)ethane hydrochloride (1:1)	3332-29-4	C2H8ClNO	97.55	131											H315, H319, H335	P261, P305 + P351 + P338	IARC: No component of this product present at levels greater than or equal to 0.1% is identified as probable, possible or confirmed human carcinogen by IARC.	Warning	Carbon oxides, nitrogen oxides (NOx), Hydrogen chloride gas	no data available	Not in this list	Not in this list	Not in this list
GC (alkylation/esterification reagent)	N,N-Dimethylformamide dineopentyl acetal	1,1-Bis(2,2-dimethylpropoxy)-N,N-dimethylmethanamine	4909-78-8	C13H29NO2	231.37	26.2	233.22	52	0.0611	3.19	6.895	-3.705	1.45	1.759	7.92	1520	H226, H315, H319, H335	P261, P305+P351+P338	IARC: No component of this product present at levels greater than or equal to 0.1% is identified as probable, possible or confirmed human carcinogen by IARC.	Warning	Carbon oxides, Nitrogen oxides (NOx)	no data available	Not in this list	Not in this list	Not in this list
GC (alkylation/esterification reagent)	4-nitrobenzyl bromide	1-(Bromomethyl)-4-nitrobenzene	100-11-8	C7H6BrNO2	216.03	99	281.73	137.8	0.000977	2.7	6.657	-3.957	2.776	1.38	3.96	1050	H314	P280, P305+P351+P338, P310	IARC: No component of this product present at levels greater than or equal to 0.1% is identified as probable, possible or confirmed human carcinogen by IARC.	Danger	Carbon oxides, nitrogen oxides (NOx), Hydrogen bromide gas	LD50 Intravenous - mouse - 56 mg/kg	Not in this list	Not in this list	Not in this list
GC (alkylation/esterification reagent)	Nonafluoro-1-iodobutane	1,1,1,2,2,3,3,4,4-Nonafluoro-4-iodobutane	423-39-2	C4F9I	345.93	-88	67	18.7	143	4.9	1.59	3.31	3.681	3.077	100	532	H315, H319, H335	P261, P305+P351+P338	IARC: No component of this product present at levels greater than or equal to 0.1% is identified as probable, possible or confirmed human carcinogen by IARC.	Warning	Carbon oxides, Hydrogen fluoride, Hydrogen iodide	LC50 Inhalation - Rat - 4 h - 14000 ppm	Not in this list	Not in this list	Not in this list
GC (alkylation/esterification reagent)	Triethyloxonium hexafluorophosphate	Triethyloxonium hexafluorophosphate	17950-40-2	C6H15F6OP	248.15	145		57									H228, H314	P210, P280, P305+P351+P338, P310	IARC: No component of this product present at levels greater than or equal to 0.1% is identified as probable, possible or confirmed human carcinogen by IARC.	Danger	Carbon oxides, Oxides of phosphorus, Hydrogen fluoride	no data available	Not in this list	Not in this list	Not in this list
GC (alkylation/esterification reagent)	2,2,2-Trifluoroethanol	2,2,2-Trifluoroethanol	75-89-8	C2H3F3O	100.04	-44	78	29	70	0.31			1.5807	0.0530784			H226, H301, H312, H315, H318, H331, H335	P261, P280, P301+P310, P305+P351+P338, P311	IARC: No component of this product present at levels greater than or equal to 0.1% is identified as probable, possible or confirmed human carcinogen by IARC.	Danger	Carbon oxides, Hydrogen fluoride	LD50 Oral - rat - 240 mg/kg; LC50 Inhalation - rat - 6 h - 470 ppm	Not in this list	Not in this list	Not in this list
GC (alkylation/esterification reagent)	Trimethyloxonium tetrafluoroborate	Trimethyloxonium tetrafluoroborate	420-37-1	C3H9BF4O	147.91	190		110									H314	P280, P305+P351+P338, P310	IARC: No component of this product present at levels greater than or equal to 0.1% is identified as probable, possible or confirmed human carcinogen by IARC.	Danger	Carbon oxides, Hydrogen fluoride, Borane/boron oxides	no data available	Not in this list	Not in this list	Not in this list
GC (alkylation/esterification reagent)	2,2-Dimethoxypropane	2,2-Dimethoxypropane	77-76-9	C5H12O2	104.148	-47	83	-10	60	1.224			1.87379	0.463893			H225, H319	P210, P305 + P351 + P338	IARC: No component of this product present at levels greater than or equal to 0.1% is identified as probable, possible or confirmed human carcinogen by IARC.	Danger	Carbon oxides	LD50 Oral – Rat - > 2.260 mg/kg LD50 Dermal – Rat - > 2.100 mg/kg	Not in this list	Not in this list	Not in this list
GC (alkylation/esterification reagent)	18-crown-6	1,4,7,10,13,16-Hexaoxacyclooctadecane	17455-13-9	C12H24O6	264.32	40	351.3	113	6.67e-05	-0.68	10.171	-10.851	1	0.5	1.85	974	H302	P301+P312+P330	IARC: No component of this product present at levels greater than or equal to 0.1% is identified as probable, possible or confirmed human carcinogen by IARC.	Warning	Carbon oxides	LD50 Oral - Rat - 525 mg/kg; LD50 Dermal - Rabbit - 3.888 mg/kg	Not in this list	Not in this list	Not in this list
GC (alkylation/esterification reagent)	2,3-Dihydroxy-biphenyl	2,3-Biphenyldiol	1133-63-7	C12H10O2	186.21	110.5	352.9	174.8		2.33			2.74499	1.68296			H315, H319, H335	P261, P305 + P351 + P338	IARC: No component of this product present at levels greater than or equal to 0.1% is identified as probable, possible or confirmed human carcinogen by IARC.	Warning	Carbon oxides	no data available	Not in this list	Not in this list	Not in this list
GC (silylating reagent)	N,O-Bis(trimethylsilyl)acetamide	Trimethylsilyl (1E)-N-(trimethylsilyl)ethanimidate	10416-59-8	C8H21NOSi2	203.429	24	72	44	2.42	4.76	5.638	-0.878	3.336	2.962	80.15	1050	H226, H302, H314	P280, P305 + P351 + P338, P310	No component of this product present at levels greater than or equal to 0.1% is identified as probable, possible or confirmed human carcinogen by IARC.	Danger	Carbon oxides, nitrogen oxides (NOx), silicon oxides	LD50 Oral - rat - 1.580 mg/kg	Not in this list	Not in this list	Not in this list
GC (silylating reagent)	Bis(trimethylsilyl) trifluoroacetamide	2,2,2-Trifluoro-N,N-bis(trimethylsilyl)acetamide	25561-30-2	C8H18F3NOSi2	257.4	-10	170	75	0.363	3.36	7.402	-4.042	3.15	1.885	10.33	1700	H226, H314	P280, P305 + P351 + P338, P310	IARC: No component of this product present at levels greater than or equal to 0.1% is identified as probable, possible or confirmed human carcinogen by IARC.	Danger	Carbon oxides, nitrogen oxides (NOx), Hydrogen fluoride, silicon oxides	no data available	Not in this list	Not in this list	Not in this list
GC (silylating reagent)	Chlorodimethylsilane	Chloro(dimethyl)silane	1066-35-9	C2H7ClSi	94.62	-111	34.7	-23	522	2.78			1.545	1.444	99.8	166	H224, H261, H314, H331	P210, P231 + P232, P280, P303 + P361 + P353, P305 + P351 + P338, P370 + P378	IARC: No component of this product present at levels greater than or equal to 0.1% is identified as probable, possible or confirmed human carcinogen by IARC.	Danger	Carbon oxides, Hydrogen chloride gas, silicon oxides	LC50 Inhalation – Rat - male and female - 1 h - 8,66 mg/l	Not in this list	Not in this list	Not in this list
GC (silylating reagent)	Chlorotrimethylsilane	Chloro(trimethyl)silane	75-77-4	C3H9ClSi	108.64	-40	56.5	-28	100	2.48	2.063	0.417	1.687	1.211	96.13	140	H225, H312, H314, H331, H335	P210, P261, P280, P305 + P351 + P338, P310	IARC: No component of this product present at levels greater than or equal to 0.1% is identified as probable, possible or confirmed human carcinogen by IARC. This material has not been classified by IARC, OSHA, ACGIH, EPA, or NTP as to its carcinogenicity, however, some studies have shown that this materi al may induce certain types of cancers	Danger	Carbon oxides, Hydrogen chloride gas, silicon oxides	LD50 Oral – rat - 4.862 mg/kg, LC50 Inhalation – rat - 1 h - 12.900 mg/m3, LD50 Dermal – rabbit - 1.529 mg/kg	Governmental List	Not in this list	Not in this list
GC (silylating reagent)	1,1,1,3,3,3-hexamethyl disilizane	1,1,1-Trimethyl-N-(trimethylsilyl)silanamine	999-97-3	C6H19NSi2	161.39	-78	125	11.4	12.5	2.62	5.069	-2.449	2.595	1.315	7.63	437	H225, H302+H332, H311, H412	P210, P261, P273, P280, P302 + P352 + P312, P304 + P340 + P312	IARC: No component of this product present at levels greater than or equal to 0.1% is identified as probable, possible or confirmed human carcinogen by IARC.	Danger	Carbon oxides, Nitrogen oxides (NOx), silicon oxides	LD50 Oral - Rat - male and female - 851 mg/kg	Not in this list	Not in this list	Not in this list
GC (silylating reagent)	1,1,1,3,3,3-hexamethyl disiloxane	Hexamethyldisiloxane	107-46-0	C6H18OSi2	162.38	-59	101	-2	39.1	4.2	1.935	2.265	2.595	2.534	99.95	136	H225, H410	P210, P273, P391, P403+P235, P501	IARC: No component of this product present at levels greater than or equal to 0.1% is identified as probable, possible or confirmed human carcinogen by IARC.	Danger	Carbon oxides, silicon oxides	LD50 Oral - Rat - > 5.000 mg/kg	NGO or Trade Union List	Not in this list	Not in this list
GC (silylating reagent)	N-methyl-N-(trimethylsilyl)-acetamide	N-methyl-N-(trimethylsilyl)acetamide	7449-74-3	C6H15NOSi	145.27	-0.75	160	48	0.918	0.91	6.209	-5.299	1.737	0.5	1.89	426	H226	none	IARC: No component of this product present at levels greater than or equal to 0.1% is identified as probable, possible or confirmed human carcinogen by IARC.	Warning	Carbon oxides, Nitrogen oxides (NOx), silicon oxides	no data available	Not in this list	Not in this list	Not in this list
GC (silylating reagent)	N-methyl-N-(trimethylsilyl) tri-fluoroacetamide	2,2,2-Trifluoro-N-methyl-N-(trimethylsilyl)acetamide	24589-78-4	C6H12F3NOSi	199.246	-3	131	25	8.8	1.96	6.361	-4.401	2.381	0.811	2.26	1170	H226, H315, H319, H335	P261, P305 + P351 + P338	IARC: No component of this product present at levels greater than or equal to 0.1% is identified as probable, possible or confirmed human carcinogen by IARC.	Warning	Carbon oxides, Nitrogen oxides (NOx), Hydrogen fluoride, silicon oxides	no data available	Not in this list	Not in this list	Not in this list
GC (silylating reagent)	tetramethyldisilazane	N-(Dimethylsilyl)-1,1-dimethylsilanamine	15933-59-2	C4H15NSi2	133.34	6.01	99.5	-3		2.89			2.286	1.523	99.92	174	H225, H315, H319, H335	P210, P261, P305 + P351 + P338	IARC: No component of this product present at levels greater than or equal to 0.1% is identified as probable, possible or confirmed human carcinogen by IARC.	Danger	Carbon oxides, Nitrogen oxides (NOx), silicon oxides	no data available	Not in this list	Not in this list	Not in this list
GC (silylating reagent)	N-trimethylsilyl diethylamine	N,N-Diethyl-1,1,1-trimethylsilanamine	996-50-9	C7H19NSi	145.32	-10	125	9	16.6	2.42	4.641	-2.221	2.512	1.16	9.49	363	H225, H314	P210, P280, P305 + P351 + P338, P310	IARC: No component of this product present at levels greater than or equal to 0.1% is identified as probable, possible or confirmed human carcinogen by IARC.	Danger	Carbon oxides, nitrogen oxides (NOx), silicon oxides	no data available	Not in this list	Not in this list	Not in this list
GC (silylating reagent)	N-trimethylthylsilyl imidazole	1-(Trimethylsilyl)-1H-imidazole	18156-74-6	C6H12N2Si	140.25	-42	93	18	0.0601	2.38			1.841	1.133	3.57	427	H225, H315, H319, H335	P210, P261, P305 + P351 + P338	No component of this product present at levels greater than or equal to 0.1% is identified as probable, possible or confirmed human carcinogen by IARC.	Danger	- Carbon oxides, Nitrogen oxides (NOx), silicon oxides	No data available	Not in this list	Not in this list	Not in this list
GC (silylating reagent)	1,1,3,3-Tetramethyl-1,3-diphenyldisilazane	N-[Dimethyl(phenyl)silyl]-1,1-dimethyl-1-phenylsilanamine	3449-26-1	C16H23NSi2	285.53	90.72	98	113	7.41e-05	5.81	10.68	-4.87	5.365	3.774	91.15	2510	H315, H319, H335	P261, P305 + P351 + P338	IARC: No component of this product present at levels greater than or equal to 0.1% is identified as probable, possible or confirmed human carcinogen by IARC.	Warning	Carbon oxides, Nitrogen oxides (NOx), silicon oxides	no data available	Not in this list	Not in this list	Not in this list
GC (silylating reagent)	tert-Butyldimethylsilyl trifluoromethanesulfonate	Dimethyl(2-methyl-2-propanyl)silyl trifluoromethanesulfonate	69739-34-0	C7H15F3O3SSi	264.34	-30	66	37	0.0461	5.63	6.875	-1.245	3.024	3.635	90.28	2440	H226, H314, H335	P261, P280, P305 + P351 + P338, P310	IARC: No component of this product present at levels greater than or equal to 0.1% is identified as probable, possible or confirmed human carcinogen by IARC.	Danger	Carbon oxides, Sulphur oxides, Hydrogen fluoride, silicon oxides	no data available	Not in this list	Not in this list	Not in this list
GC (silylating reagent)	tert-Butyldimethylsilyl chloride	Chloro(dimethyl)(2-methyl-2-propanyl)silane	18162-48-6	C6H15ClSi	150.72	86-89	125	22		3.84	3.052	0.788	2.352	2.26	98.47	197	H228, H314	P210, P280, P305 + P351 + P338, P310	IARC: No component of this product present at levels greater than or equal to 0.1% is identified as probable, possible or confirmed human carcinogen by IARC.	Danger	Carbon oxides, Hydrogen chloride gas, silicon oxides	LD50 Oral – rat - > 2.000 mg/kg	Not in this list	Not in this list	Not in this list
GC (silylating reagent)	N,O-Bis(tert-butyldimethylsilyl)acetamide	Dimethyl(2-methyl-2-propanyl)silyl (1E)-N-[dimethyl(2-methyl-2-propanyl)silyl]ethanimidate	82112-21-8	C14H33NOSi2	287.59	4.62	240.05	125.4	0.0462	7.48	7.62	-0.14	4.665	4.153	94.04	4580	H314	P280, P305 + P351 + P338, P310	IARC: No component of this product present at levels greater than or equal to 0.1% is identified as probable, possible or confirmed human carcinogen by IARC.	Danger	Carbon oxides, nitrogen oxides (NOx), silicon oxides	no data available	Not in this list	Not in this list	Not in this list
GC (silylating reagent)	tert-Butyl(chloro)diphenylsilane	Chloro(2-methyl-2-propanyl)diphenylsilane	58479-61-1	C16H19ClSi	274.86		90	112	0.000183	6.66	8.295	-1.635	5.122	4.426	93.64	2770	H314	P280, P305 + P351 + P338, P310	IARC: No component of this product present at levels greater than or equal to 0.1% is identified as probable, possible or confirmed human carcinogen by IARC.	Danger	Carbon oxides, Hydrogen chloride gas, silicon oxides	no data available	Not in this list	Not in this list	Not in this list
GC (silylating reagent)	Hexamethyldisilazane	1,1,1-Trimethyl-N-(trimethylsilyl)silanamine	999-97-3	C6H19NSi2	161.39	-79	125	11.5	12.5	2.62	5.069	-2.449	2.595	1.315	7.63	437	H225, H302 + H332, H311, H412	P210, P261, P273, P280, P302 + P352 + P312, P304 + P340 + P312	IARC: No component of this product present at levels greater than or equal to 0.1% is identified as probable, possible or confirmed human carcinogen by IARC.	Danger	Carbon oxides, Nitrogen oxides (NOx), silicon oxides	LD50 Oral – Rat - male and female - 851 mg/kg ( OECD Test Guideline 401 ) LC50 Inhalation – Rat - male and female - 6 h - 10 mg/l ( OECD test Guideline 403 ) LD50 Dermal – Rabbit - male and female - 547 - 589 mg/kg ( OECD Test Guideline 402)	Not in this list	Not in this list	Not in this list
GC (silylating reagent)	Chlorotriethylsilane	Chloro(triethyl)silane	994-30-9	C6H15ClSi	150.72	-75	143	30	5.17	3.95	3.162	0.788	2.581	2.345	98.51	151	H226, H301, H314	P280, P301 + P310, P305 + P351 + P338, P310	IARC: No component of this product present at levels greater than or equal to 0.1% is identified as probable, possible or confirmed human carcinogen by IARC.	Danger	Carbon oxides, Hydrogen chloride gas, silicon oxides	LD50 Oral – rat - > 200 - 2.000 mg/kg	Not in this list	Not in this list	Not in this list
GC (silylating reagent)	N-Methyl-N-trimethylsilyl-trifluoroacetamide	2,2,2-Trifluoro-N-methyl-N-(trimethylsilyl)acetamide	24589-78-4	C6H12F3NOSi	199.246	-3	131	25	8.8	1.96	6.361	-4.401	2.381	0.811	2.26	1170	H226, H315, H319, H335	P261, P305 + P351 + P338	IARC: No component of this product present at levels greater than or equal to 0.1% is identified as probable, possible or confirmed human carcinogen by IARC.	Warning	Carbon oxides, Nitrogen oxides (NOx), Hydrogen fluoride, silicon oxides	no data available	Not in this list	Not in this list	Not in this list
GC (silylating reagent)	Bis(dimethylamino)dimethylsilane	N,N,N',N',1,1-Hexamethylsilanediamine	3768-58-9	C6H18N2Si	146.31	-98	128.5	-7	17.1	0.15	6.04	-5.89	2.193	0.5	1.85	530	H225, H314	P210, P280, P305 + P351 + P338, P310	IARC: No component of this product present at levels greater than or equal to 0.1% is identified as probable, possible or confirmed human carcinogen by IARC.	Danger	Carbon oxides, nitrogen oxides (NOx), silicon oxides	no data available	Not in this list	Not in this list	Not in this list
GC (silylating reagent)	1-(Trimethylsilyl)imidazole - Pyridine mixture	1-(Trimethylsilyl)-1H-imidazole - pyridine (1:1)	8077-35-8	C11H17N3Si	219.358			17									H225, H302 + H312 + H332, H315, H319, H335	P210, P261, P280, P305 + P351 + P338	IARC: 3 - Group 3: Not classifiable as to its carcinogenicity to humans (Boron trifluoride)	Danger	Carbon oxides, Nitrogen oxides (NOx), silicon oxides	no data available	Not in this list	Not in this list	Not in this list
GC (silylating reagent)	N-Methyl-N-trimethylsilylheptafluorobutyramide	2,2,3,3,4,4,4-Heptafluoro-N-methyl-N-(trimethylsilyl)butanamide	53296-64-3	C8H12F7NOSi	299.21	14.31	148	33	1.26	3.89	6.85	-2.96	3.711	2.299	26.24	4300	H226, H315, H319, H335	P261, P305 + P351 + P338	IARC: No component of this product present at levels greater than or equal to 0.1% is identified as probable, possible or confirmed human carcinogen by IARC.	Warning	Carbon oxides, Nitrogen oxides (NOx), Hydrogen fluoride, silicon oxides	no data available	Not in this list	Not in this list	Not in this list
GC (silylating reagent)	N,N-Bis(trimethylsilyl)methylamine	N,1,1,1-Tetramethyl-N-(trimethylsilyl)silanamine	920-68-3	C7H21NSi2	175.42	-61.83	145.5	28	24.2	2.83	4.937	-2.107	2.708	1.478	12.49	416	H226, H315, H319, H335	P261, P305 + P351 + P338	IARC: No component of this product present at levels greater than or equal to 0.1% is identified as probable, possible or confirmed human carcinogen by IARC.	Warning	Carbon oxides, Nitrogen oxides (NOx), silicon oxides	no data available	Not in this list	Not in this list	Not in this list
GC (silylating reagent)	N,O-Bis(trimethylsilyl)carbamate	Trimethylsilyl (trimethylsilyl)carbamate	35342-88-2	C7H19NO2Si2	205.4	78.5	180.12		0.96	3.13	6.947	-3.817	2.311	1.706	7.15	1060	none	none	IARC: No component of this product present at levels greater than or equal to 0.1% is identified as probable, possible or confirmed human carcinogen by IARC.	none	Hazardous decomposition products formed under fire conditions. - Carbon oxides, Nitrogen oxides (NOx), silicon oxides	no data available	Not in this list	Not in this list	Not in this list
GC (silylating reagent)	4-(Trimethylsiloxy)-3-penten-2-one	(3E)-4-[(Trimethylsilyl)oxy]-3-penten-2-one	13257-81-3	C8H16O2Si	172.3	-18.75	67	35	0.732	1.89	4.425	-2.535	1.934	0.752	5.7	332	H226, H315, H319, H335	P261, P305 + P351 + P338	IARC: No component of this product present at levels greater than or equal to 0.1% is identified as probable, possible or confirmed human carcinogen by IARC.	Warning	Carbon oxides, silicon oxides	no data available	Not in this list	Not in this list	Not in this list
GC (silylating reagent)	N,O-Bis(tert-butyldimethylsilyl)trifluoroacetamide	Dimethyl(2-methyl-2-propanyl)silyl (1E)-N-[dimethyl(2-methyl-2-propanyl)silyl]-2,2,2-trifluoroethanimidate	87020-42-6	C14H30F3NOSi2	341.56		265.3	114.3		7.14			4.79019	4.53843			H314	P280, P305 + P351 + P338, P310	IARC: No component of this product present at levels greater than or equal to 0.1% is identified as probable, possible or confirmed human carcinogen by IARC.	Danger	Carbon oxides, nitrogen oxides (NOx), Hydrogen fluoride, silicon oxides	no data available	Not in this list	Not in this list	Not in this list
GC (silylating reagent)	Trimethylsilyl methallylsulfinate	Trimethylsilyl 2-methyl-2-propene-1-sulfinate	723336-86-5	C7H16O2SSi	192.35		22.7	88.5		1.83			2.42364	1.23223			H314	P280, P305 + P351 + P338, P310	IARC: No component of this product present at levels greater than or equal to 0.1% is identified as probable, possible or confirmed human carcinogen by IARC.	Danger	Carbon oxides, Sulphur oxides, silicon oxides	no data available	Not in this list	Not in this list	Not in this list
GC (silylating reagent)	Chlorodimethyl(pentafluorophenyl)silane	Chloro(dimethyl)(pentafluorophenyl)silane	20082-71-7	C8H6ClF5Si	260.66	6.81	89	95	3.11	5.08	5.538	-0.458	4.173	3.211	89.74	3720	H314	P280, P305 + P351 + P338,P310	IARC: No component of this product present at levels greater than or equal to 0.1% is identified as probable, possible or confirmed human carcinogen by IARC.	Danger	Carbon oxides, Hydrogen chloride gas, Hydrogen fluoride, silicon oxides	no data available	Not in this list	Not in this list	Not in this list
GC (silylating reagent)	1-(tert-Butyldimethylsilyl)imidazole	1-[Dimethyl(2-methyl-2-propanyl)silyl]-1H-imidazole	54925-64-3	C9H18N2Si	182.34	57.27	247	99	0.00543	3.74			2.506	2.182	21.2	1030	H315, H319, H335	P261, P305 + P351 + P338	IARC: No component of this product present at levels greater than or equal to 0.1% is identified as probable, possible or confirmed human carcinogen by IARC.	Warning	Carbon oxides, nitrogen oxides (NOx), silicon oxides	no data available	Not in this list	Not in this list	Not in this list
GC (silylating reagent)	N-(Trimethylsilyl)acetamide	N-(Trimethylsilyl)acetamide	13435-12-6	C5H13NOSi	131.25	41	104	70	0.0483	0.7	6.339	-5.639	1.629	0.5	1.87	508	Not a hazardous substance or mixture.	Not a hazardous substance or mixture.	IARC: No component of this product present at levels greater than or equal to 0.1% is identified as probable, possible or confirmed human carcinogen by IARC.	Not a hazardous substance or mixture.	Carbon oxides, Nitrogen oxides (NOx), silicon oxides	no data available	Not in this list	Not in this list	Not in this list
GC (silylating reagent)	Bromotrimethylsilane	Bromo(trimethyl)silane	2857-97-8	C3H9BrSi	153.09	-44	79	25	98.7	2.57	2.653	-0.083	1.687	1.28	88.8	150	H226, H314	P280, P305+P351+P338, P310	IARC: No component of this product present at levels greater than or equal to 0.1% is identified as probable, possible or confirmed human carcinogen by IARC.	Danger	Carbon oxides, Hydrogen bromide gas, silicon oxides	no data available	Not in this list	Not in this list	Not in this list
GC (silylating reagent)	Triisopropylsilyl chloride	Chloro(triisopropyl)silane	13154-24-0	C9H21ClSi	192.8	-61.95	200	64	1.55	5.21	4.054	1.156	3.192	3.31	99.47	366	H314	P280, P305 + P351 + P338, P310	IARC: No component of this product present at levels greater than or equal to 0.1% is identified as probable, possible or confirmed human carcinogen by IARC.	Danger	Carbon oxides, Hydrogen chloride gas, silicon oxides	no data available	Not in this list	Not in this list	Not in this list
GC (silylating reagent)	Triisopropylsilyl trifluoro-methanesulfonate	Triisopropylsilyl trifluoromethanesulfonate	80522-42-5	C10H21F3O3SSi	306.42	56.39	270.36	103	0.00475	6.99	7.865	-0.875	3.864	4.685	93.88	4360	H314	P280, P305+P351+P338, P310	IARC: No component of this product present at levels greater than or equal to 0.1% is identified as probable, possible or confirmed human carcinogen by IARC.	Danger	Carbon oxides, Sulphur oxides, Hydrogen fluoride, silicon oxides	no data available	Not in this list	Not in this list	Not in this list
GC (silylating reagent)	N,N-Dimethyltrimethylsilylamine	N,N,1,1,1-Pentamethylsilanamine	2083-91-2	C5H15NSi	117.26	-79.68	84	12	67.9	1.43	3.897	-2.467	1.94	0.404	6.05	304	H225, H314	P210, P280, P305 + P351 + P338, P310	IARC: No component of this product present at levels greater than or equal to 0.1% is identified as probable, possible or confirmed human carcinogen by IARC.	Danger	Carbon oxides, nitrogen oxides (NOx), silicon oxides, Dimethylamine	no data available	Not in this list	Not in this list	Not in this list
GC (silylating reagent)	1,3-dimethyl-1,1,3,3-tetraphenyldisilazane	1-Methyl-N-[methyl(diphenyl)silyl]-1,1-diphenylsilanamine	7453-26-1	C26H27NSiO2	409.67	88	479.33	231.3	1.89e-09	8.24	15.532	-7.292	8.135	3.107	94.02	3940	H315, H319, H335	P261, P305 + P351 + P338	IARC: No component of this product present at levels greater than or equal to 0.1% is identified as probable, possible or confirmed human carcinogen by IARC.	Warning	Carbon oxides, nitrogen oxides (NOx), silicon oxides	no data available	Not in this list	Not in this list	Not in this list
GC (silylating reagent)	N-tert-Butyldimethylsilyl-N-methyltrifluoroacetamide	N-[Dimethyl(2-methyl-2-propanyl)silyl]-2,2,2-trifluoro-N-methylacetamide	77377-52-7	C9H18F3NOSi	241.33	27.08	172	45	0.222	3.32	7.352	-4.032	3.046	1.86	9.65	1680	H226, H315, H319, H335	P261, P305 + P351 + P338	IARC: No component of this product present at levels greater than or equal to 0.1% is identified as probable, possible or confirmed human carcinogen by IARC.	Warning	Carbon oxides, nitrogen oxides (NOx), Hydrogen fluoride, silicon oxides	no data available	Not in this list	Not in this list	Not in this list
GC (silylating reagent)	N,N’-Bis(trimethylsilyl)urea	1,3-Bis(trimethylsilyl)urea	18297-63-7	C7H20N2OSi2	204.42	219	258.94		0.00781	2.17	8.595	-6.425	2.414	0.968	2.44	1470	H228	P210	IARC: No component of this product present at levels greater than or equal to 0.1% is identified as probable, possible or confirmed human carcinogen by IARC.	Danger	Carbon oxides, nitrogen oxides (NOx), silicon oxides	no data available	Not in this list	Not in this list	Not in this list
GC (silylating reagent)	Trimethylsilyl methallylsulfinate	Trimethylsilyl 2-methyl-2-propene-1-sulfinate	723336-86-5	C7H16O2SSi	192.35		222.7	88.5	0.1	1.83			2.42364	1.23223			H314	P280, P305+P351+P338, P310	IARC: No component of this product present at levels greater than or equal to 0.1% is identified as probable, possible or confirmed human carcinogen by IARC.	Danger	Carbon oxides, Sulphur oxides, silicon oxides	no data available	Not in this list	Not in this list	Not in this list
GC (silylating reagent)	Triethylsilyl methallylsulfinate	Triethylsilyl 2-methyl-2-propene-1-sulfinate	850418-19-8	C10H22O2SSi	234.43		279.7	122.9	0	3.43			3.1711	2.27646			H314	P280, P305+P351+P338, P310	IARC: No component of this product present at levels greater than or equal to 0.1% is identified as probable, possible or confirmed human carcinogen by IARC.	Danger	Carbon oxides, Sulphur oxides, silicon oxides	no data available	Not in this list	Not in this list	Not in this list
GC (silylating reagent)	tert-Butyldimethylsilyl methallylsulfinate	Dimethyl(2-methyl-2-propanyl)silyl 2-methyl-2-propene-1-sulfinate	850418-20-1	C10H22O2SSi	234.43		270	117.1	0	3.06			3.05016	2.10752			H314	P280, P305 + P351 + P338, P310	IARC: No component of this product present at levels greater than or equal to 0.1% is identified as probable, possible or confirmed human carcinogen by IARC.	Danger	Carbon oxides, Sulphur oxides, silicon oxides	no data available	Not in this list	Not in this list	Not in this list
GC (silylating reagent)	Dimethyldiacetoxysilane	Dimethylsilanediyl diacetate	2182-66-3	C6H12O4Si	176.24	-12.5	163	69	1.98	1.2	3.898	-2.698	1	0.222	4.43	337	H314	P280, P305 + P351 + P338, P310	IARC: No component of this product present at levels greater than or equal to 0.1% is identified as probable, possible or confirmed human carcinogen by IARC.	Danger	Carbon oxides, silicon oxides	no data available	Not in this list	Not in this list	Not in this list
For chiral derivatization	(1R )-(-)-menthyl chloroformate	(1R,2S,5S)-2-Isopropyl-5-methylcyclohexyl carbonochloridate	14602-86-9	C11H19ClO2	218.72	12.62	243.52	70	0.0384	4.15	4.415	-0.265	2.881	2.495	87.2	547	H314, H331	P261, P280, P305 + P351 + P338, P310	IARC: No component of this product present at levels greater than or equal to 0.1% is identified as probable, possible or confirmed human carcinogen by IARC.	Danger	Carbon oxides, Hydrogen chloride gas	no data available	Not in this list	Not in this list	Not in this list
For chiral derivatization	L-(+)-2,3-Butanediol	(2S,3S)-2,3-Butanediol	19132-06-0	C4H10O	90.12	-34.4	178	85	0.172	-0.36	4.107	-5.027	0	0.5	1.86	259	none	none	IARC: No component of this product present at levels greater than or equal to 0.1% is identified as probable, possible or confirmed human carcinogen by IARC.	none	Carbon oxides	no data available	Not in this list	Not in this list	Not in this list
For chiral derivatization	(R)-(+)-1-Phenylethanol	(1R)-1-Phenylethanol	1517-69-7	C8H10O	122.16	10	236	86	0.0545	1.42	6.348	-4.928	1.393	-0.257	1.97	427	H302, H315, H318	P280, P305 + P351 + P338	IARC: No component of this product present at levels greater than or equal to 0.1% is identified as probable, possible or confirmed human carcinogen by IARC.	Danger	Carbon oxides	LD50 Dermal - rabbit - 2500 mg/kg	Not in this list	Not in this list	Not in this list
For chiral derivatization	(S)-(−)-1-Phenylethanol	(1S)-1-Phenylethanol	1445-91-6	C8H10O	122.16	10	224	86	0.0545	1.42	6.348	-4.928	1.393	-0.257	1.97	427	H302, H315, H318	P280, P305 + P351 + P338	IARC: No component of this product present at levels greater than or equal to 0.1% is identified as probable, possible or confirmed human carcinogen by IARC.	Danger	Carbon oxides	LD50 Oral – rat - 400 mg/kg LD50 Dermal – rabbit - 2500 mg/kg	Not in this list	Not in this list	Not in this list
For chiral derivatization	(R)-(+)-α-Methylbenzylamine	(1R)-1-Phenylethanamine	3886-69-9	C8H11N	121.18	-10	188	70	0.5	1.49	5.969	-4.479	2.778	0.445	2.02	384	H302 + H312, H314	P280, P305 + P351 + P338, P310	IARC: No component of this product present at levels greater than or equal to 0.1% is identified as probable, possible or confirmed human carcinogen by IARC.	Danger	Carbon oxides, nitrogen oxides (NOx)	no data available	Not in this list	Not in this list	Not in this list
For chiral derivatization	(S)-(−)-α-Methylbenzylamine	(1S)-1-Phenylethanamine	2627-86-3	C8H11N	121.18	-10	187	70	0.5	1.49	5.969	-4.479	2.778	0.445	2.02	384	H302, H311, H314	P280, P305 + P351 + P338, P310	IARC: No component of this product present at levels greater than or equal to 0.1% is identified as probable, possible or confirmed human carcinogen by IARC.	Danger	Carbon oxides, nitrogen oxides (NOx)	LD50 Oral – rat - 950 mg/kg LD50 Dermal – rabbit - 730 mg/kg Toxicity to fish LC50 - Pimephales promelas (fathead minnow) -17 mg/l - 96 h	Not in this list	Not in this list	Not in this list
For chiral derivatization	(S)-5-Allyl-2-oxabicyclo[3.3.0]oct-8-ene	(3aS)-3a-Allyl-3,3a,4,5-tetrahydro-2H-cyclopenta[b]furan	1052236-86-8	C10H14O	150.22		217.2	77.8	0.2	2.61			2.73	1.67			none	none	IARC: No component of this product present at levels greater than or equal to 0.1% is identified as probable, possible or confirmed human carcinogen by IARC.	none	Carbon oxides	no data available	Not in this list	Not in this list	Not in this list
For chiral derivatization	(R)-(+)-1-(1-Naphthyl)ethylamine	(1R)-1-(1-Naphthyl)ethanamine	3886-70-2	C12H13N	171.24	76.27	319	113	0.000678	2.66	8.149	-5.489	3.746	1.35	3.65	484	H315, H319, H335	P261, P305 + P351 + P338	IARC: No component of this product present at levels greater than or equal to 0.1% is identified as probable, possible or confirmed human carcinogen by IARC.	Warning	Carbon oxides, nitrogen oxides (NOx)	no data available	Not in this list	Not in this list	Not in this list
For chiral derivatization	(R)-(+)-α-Methylbenzyl isocyanate	[(1R)-1-Isocyanatoethyl]benzene	33375-06-3	C9H9NO	147.17	18.18	232	65	0.168	2.91	5.302	-2.392	3.464	1.542	9.54	430	H315, H319, H330, H334, H335	P260, P284, P305 + P351 + P338, P310	IARC: No component of this product present at levels greater than or equal to 0.1% is identified as probable, possible or confirmed human carcinogen by IARC.	Danger	Carbon oxides, nitrogen oxides (NOx), Hydrogen cyanide (hydrocyanic acid)	no data available	Not in this list	Not in this list	Not in this list
For chiral derivatization	(S)-(−)-α-Methylbenzyl isocyanate	[(1S)-1-Isocyanatoethyl]benzene	14649-03-7	C9H9NO	147.17	18.18	224	65	0.168	2.91	5.302	-2.392	3.464	1.542	9.54	430	H315, H319, H330, H334, H335	P260, P284, P305 + P351 + P338, P310	IARC: No component of this product present at levels greater than or equal to 0.1% is identified as probable, possible or confirmed human carcinogen by IARC.	Danger	Carbon oxides, nitrogen oxides (NOx), Hydrogen cyanide (hydrocyanic acid)	LC50 - Pimephales promelas (fathead minnow) - 17 mg/l - 96 h	Not in this list	Not in this list	Not in this list
For chiral derivatization	(R)-(−)-1-(1-Naphthyl)ethyl isocyanate	1-[(1R)-1-Isocyanatoethyl]naphthalene	42340-98-7	C13H11NO	197.23	85.33	107	93.4	0.000224	4.09	7.492	-3.402	4.519	2.448	34.62	475	H301, H315, H317, H319, H334, H335	P261, P280, P301 + P310, P305 + P351 + P338, P342 + P311	IARC: No component of this product present at levels greater than or equal to 0.1% is identified as probable, possible or confirmed human carcinogen by IARC.	Danger	Carbon oxides, nitrogen oxides (NOx)	no data available	Not in this list	Not in this list	Not in this list
For chiral derivatization	(S)-Trolox methyl ether	6-Methoxy-2,5,7,8-tetramethyl-2-chromanecarboxylic acid	135806-59-6	C15H20O4	264.32	153.6	385.45	152.7	9.12e-07	4.11	11.442	-7.332	2.273	0.5	35.33	1740	none	none	IARC: No component of this product present at levels greater than or equal to 0.1% is identified as probable, possible or confirmed human carcinogen by IARC.	none	Carbon oxides	no data available	Not in this list	Not in this list	Not in this list
For chiral derivatization	(R)-6-Methoxy-2,5,7,8-tetramethylchromane-2-carboxylic acid	6-Methoxy-2,5,7,8-tetramethyl-2-chromanecarboxylic acid	139658-04-1	C15H20O5	264.32	152	385.45	152.7	9.12e-07	4.11	11.442	-7.332	2.273	0.5	35.33	1740	none	none	IARC: No component of this product present at levels greater than or equal to 0.1% is identified as probable, possible or confirmed human carcinogen by IARC.	none	Carbon oxides	no data available	Not in this list	Not in this list	Not in this list
For chiral derivatization	(R)-(+)-α-Methoxy-α-trifluoromethylphenylacetic acid	(2R)-3,3,3-Trifluoro-2-methoxy-2-phenylpropanoic acid	20445-31-2	C10H9F3O3	234.17	44	106	113	0.00118	1.57	7.375	-5.805	1.521	0.5	2	1080	H315, H319, H335	P261, P305 + P351 + P338	IARC: No component of this product present at levels greater than or equal to 0.1% is identified as probable, possible or confirmed human carcinogen by IARC.	Warning	Carbon oxides, Hydrogen fluoride	no data available	Not in this list	Not in this list	Not in this list
For chiral derivatization	(S)-(−)-α-Methoxy-α-(trifluoromethyl)phenylacetic acid	3,3,3-Trifluoro-2-methoxy-2-phenylpropanoic acid	17257-71-5	C10H9F3O3	234.17	44	338	110	0.00118	1.57	7.375	-5.805	1.521	0.5	2	1080	H315, H319, H335	P261, P305 + P351 + P338	IARC: No component of this product present at levels greater than or equal to 0.1% is identified as probable, possible or confirmed human carcinogen by IARC.	Warning	Carbon oxides, Hydrogen fluoride	no data available	Not in this list	Not in this list	Not in this list
For chiral derivatization	(±)-α-Methoxy-α-trifluoromethylphenylacetic acid	(2S)-3,3,3-Trifluoro-2-methoxy-2-phenylpropanoic acid	81655-41-6	C10H9F3O3	234.17	44	338	110	0.00118	1.57	7.375	-5.805	1.521	0.5	2	1080	H315, H319, H335	P261, P305 + P351 + P338	IARC: No component of this product present at levels greater than or equal to 0.1% is identified as probable, possible or confirmed human carcinogen by IARC.	Warning	Carbon oxides, Hydrogen fluoride	no data available	Not in this list	Not in this list	Not in this list
For chiral derivatization	(+)-1-(9-Fluorenyl)ethyl chloroformate	(1S)-1-(9H-Fluoren-9-yl)ethyl carbonochloridate	107474-79-3	C16H13O2Cl	272.73	119.65	367.57	-17	5.8e-06	3.87	7.284	-3.414	4.305	2.281	24.85	1090	H225, H319, H335	P210, P261, P305 + P351 + P338	IARC: No component of this product present at levels greater than or equal to 0.1% is identified as probable, possible or confirmed human carcinogen by IARC.	Danger	Carbon oxides, Hydrogen chloride gas	no data available	Not in this list	Not in this list	Not in this list
For chiral derivatization	N-Isobutyryl-L-cysteine	N-Isobutyryl-L-cysteine	124529-02-8	C7H13NO3S	191.25	99	376.87	196.7	2.06e-06	0.25	11.157	-10.907	1	0.5	1.85	585	none	none	IARC: No component of this product present at levels greater than or equal to 0.1% is identified as probable, possible or confirmed human carcinogen by IARC.	none	Carbon oxides, nitrogen oxides (NOx), Sulphur oxides	no data available	Not in this list	Not in this list	Not in this list
For chiral derivatization	N-Isobutyryl-D-cysteine	N-Isobutyryl-D-cysteine	124529-07-3	C7H13NO3S	191.25	99	376.87	196.7	2.06e-06	0.25	11.157	-10.907	1	0.5	1.85	585	none	none	IARC: No component of this product present at levels greater than or equal to 0.1% is identified as probable, possible or confirmed human carcinogen by IARC.	none	Carbon oxides, nitrogen oxides (NOx), Sulphur oxides	no data available	Not in this list	Not in this list	Not in this list
For chiral derivatization	Nα-(2,4-Dinitro-5-fluorophenyl)-L-valinamide	N2-(5-Fluoro-2,4-dinitrophenyl)-L-valinamide	132679-61-9	C11H13FN4O5	300.24	175	460.76	278	4.42e-09	1.77	14.097	-12.317	2.776	0.662	2.08	2480	H315, H319, H335	P261, P305 + P351 + P338	IARC: No component of this product present at levels greater than or equal to 0.1% is identified as probable, possible or confirmed human carcinogen by IARC.	Warning	Carbon oxides, nitrogen oxides (NOx), Hydrogen fluoride	no data available	Not in this list	Not in this list	Not in this list
For chiral derivatization	Nα-(2,4-Dinitro-5-fluorophenyl)-D-valinamide	N2-(5-Fluoro-2,4-dinitrophenyl)-D-valinamide	210529-62-7	C11H13FN4O5	300.24	175	460.76	278	4.42e-09	1.77	14.097	-12.317	2.776	0.662	2.08	2480	H315, H319, H335	P261, P305 + P351 + P338	IARC: No component of this product present at levels greater than or equal to 0.1% is identified as probable, possible or confirmed human carcinogen by IARC.	Warning	Carbon oxides, nitrogen oxides (NOx), Hydrogen fluoride	no data available	Not in this list	Not in this list	Not in this list
For chiral derivatization	(1R)-(+)-Camphanic chloride	(1R,4S)-4,7,7-Trimethyl-3-oxo-2-oxabicyclo[2.2.1]heptane-1-carbonyl chloride	104530-16-7	C10H13ClO3	216.66	68.5	306.63		0.000335	0.06	3.373	-3.313	1.453	0.5	2.5	610	H314	P280, P305 + P351 + P338, P310	IARC: No component of this product present at levels greater than or equal to 0.1% is identified as probable, possible or confirmed human carcinogen by IARC.	Danger	Carbon oxides, Hydrogen chloride gas	no data available	Not in this list	Not in this list	Not in this list
For chiral derivatization	(−)-α-Methylbenzyl isothiocyanate	(1-Isothiocyanatoethyl)benzene	24277-44-9	C9H9NS	163.24	28.61	270	103	0.0239	3.362	5.326	-1.866	2.364	1.964	23.2	424	H315, H317, H319, H334, H335	P261, P280, P305 + P351 + P338, P342 + P311	IARC: No component of this product present at levels greater than or equal to 0.1% is identified as probable, possible or confirmed human carcinogen by IARC.	Danger	Carbon oxides, nitrogen oxides (NOx), Sulphur oxides	no data available	Not in this list	Not in this list	Not in this list
For chiral derivatization	(S)-(+)-α-Methylbenzyl isothiocyanate	(1-Isothiocyanatoethyl)benzene	24277-43-8	C9H9NS	163.24	28.61	270	103	0.0239	3.362	5.326	-1.866	2.364	1.964	23.2	424	none	none	IARC: No component of this product present at levels greater than or equal to 0.1% is identified as probable, possible or confirmed human carcinogen by IARC.	none	Carbon oxides, nitrogen oxides (NOx), Sulphur oxides	no data available	Not in this list	Not in this list	Not in this list
For chiral derivatization	(+)-Tröger’s base	5,13-Dimethyl-1,9-diazatetracyclo[7.7.1.02,7.010,15]heptadeca-2,4,6,10,12,14-hexaene	21451-74-1	C17H18N2	250.34	129	365.39	213.5	3.88e-06	3.89	7.567	-3.677	4.243	2.296	25.49	1630	H315, H319, H335	P261, P305 + P351 + P338	IARC: No component of this product present at levels greater than or equal to 0.1% is identified as probable, possible or confirmed human carcinogen by IARC.	Warning	Carbon oxides, nitrogen oxides (NOx)	no data available	Not in this list	Not in this list	Not in this list
For chiral derivatization	(−)-Tröger’s base	4,12-Dimethyl-1,9-diazatetracyclo[7.7.1.02,7.010,15]heptadeca-2,4,6,10,12,14-hexaene	14645-24-0	C17H18N2	250.34	129	365.39	213.5	3.88e-06	3.723	7.567	-3.677	4.243	2.296	25.49	1630	H315, H319, H335	P261, P305 + P351 + P338	IARC: No component of this product present at levels greater than or equal to 0.1% is identified as probable, possible or confirmed human carcinogen by IARC.	Warning	Carbon oxides, nitrogen oxides (NOx)	no data available	Not in this list	Not in this list	Not in this list
For chiral derivatization	(1S)-(−)-Camphanic chloride	4,7,7-Trimethyl-3-oxo-2-oxabicyclo[2.2.1]heptane-1-carbonyl chloride	39637-74-6	C10H13ClO3	216.66	68.5	306.6	125	0.000335	0.06	3.373	-3.313	1.453	0.5	2.5	610	H314	P280, P305 + P351 + P338, P310	IARC: No component of this product present at levels greater than or equal to 0.1% is identified as probable, possible or confirmed human carcinogen by IARC.	Danger	Carbon oxides, Hydrogen chloride gas	no data available	Not in this list	Not in this list	Not in this list
For chiral derivatization	2,3,4,6-Tetra-O-pivaloyl-β-D-galactopyranosyl isothiocyanate	2,3,4,6-Tetrakis-O-(2,2-dimethylpropanoyl)-N-(thioxomethylene)-β-D-galactopyranosylamine	147948-52-5	C27H43NO9S	557.7	143.5	572.71	300.16	0	7.36			5.23	5.15			H315, H319, H335	P261, P305 + P351 + P338	IARC: No component of this product present at levels greater than or equal to 0.1% is identified as probable, possible or confirmed human carcinogen by IARC.	Warning	Carbon oxides, nitrogen oxides (NOx), Sulphur oxides	no data available	Not in this list	Not in this list	Not in this list
For chiral derivatization	2,3,4-Tri-O-acetyl-α-D-arabinopyranosyl isothiocyanate	2,3,4-Tri-O-acetyl-N-(thioxomethylen)-α-D-arabinopyranosylamin	62414-75-9	C12H15NO7S	317.32	74.25	368.51		0.000165	0.22	10.505	-10.285	1	0.5	1.85	585	H315, H317, H319, H334, H335	P261, P280, P305 + P351 + P338, P342 + P311	IARC: No component of this product present at levels greater than or equal to 0.1% is identified as probable, possible or confirmed human carcinogen by IARC.	Danger	Carbon oxides, nitrogen oxides (NOx), Sulphur oxides	no data available	Not in this list	Not in this list	Not in this list
For chiral derivatization	(S)-(−)-α-Methyl-2,3,4,5,6-pentafluorobenzyl alcohol	(1S)-1-(Pentafluorophenyl)ethanol	104371-20-2	C8H5F5O	212.12	41.5	183.94	87	0.193	2.5	7.093	-4.593	2.494	0.571	3.13	2670	H315, H319, H335	P261, P305 + P351 + P338	IARC: No component of this product present at levels greater than or equal to 0.1% is identified as probable, possible or confirmed human carcinogen by IARC.	Warning	Carbon oxides, nitrogen oxides (NOx), Sulphur oxides	no data available	Not in this list	Not in this list	Not in this list
For chiral derivatization	(S)-2-Hydroxybutyric acid	(2S)-2-Hydroxybutanoic acid	3347-90-8	C4H8O3	104.1	52	238	112.2	0	-0.403	5.049	-5.209	0	0.5	1.86	290	H315, H319, H336	P261, P305 + P351 + P338	IARC: No component of this product present at levels greater than or equal to 0.1% is identified as probable, possible or confirmed human carcinogen by IARC.	Danger	Carbon oxides	no data available	Not in this list	Not in this list	Not in this list
For chiral derivatization	(R)-(−)-2-Octanol	(2R)-2-Octanol	5978-70-1	C8H18O	130.23	-27.45	175	76	0.3	2.9	5.199	-2.299	1.375	1.533	10.41	264	H315, H319, H335	P261, P305 + P351 + P338	IARC: No component of this product present at levels greater than or equal to 0.1% is identified as probable, possible or confirmed human carcinogen by IARC.	Warning	Carbon oxides	no data available	Not in this list	Not in this list	Not in this list
For chiral derivatization	(1R)-(−)-10-Camphorsulfonyl chloride	[(1R)-7,7-Dimethyl-2-oxobicyclo[2.2.1]hept-1-yl]methanesulfonyl chloride	39262-22-1	C10H15ClO3S	250.74	67	339.98	165.1	0	3.48	9.248	-5.768	2.033	1.983	12.59	2020	H314	P280, P305 + P351 + P338, P310	IARC: No component of this product present at levels greater than or equal to 0.1% is identified as probable, possible or confirmed human carcinogen by IARC.	Danger	Carbon oxides, Sulphur oxides, Hydrogen chloride gas	no data available	Not in this list	Not in this list	Not in this list
For chiral derivatization	2,3,4,6-Tetra-O-acetyl-β-D-glucopyranosyl isothiocyanate	2,3,4,6-Tetra-O-acetyl-N-(thioxomethylene)-β-D-glucopyranosylamine	14152-97-7	C15H19No9S	389.38	115	469.66	237.85	0.000255	0.18	12.964	-12.784	2.101	0.5	1.85	584	H315, H317, H319, H334, H335	P261, P280, P305 + P351 + P338, P342 + P311	IARC: No component of this product present at levels greater than or equal to 0.1% is identified as probable, possible or confirmed human carcinogen by IARC.	Danger	Carbon oxides, nitrogen oxides (NOx), Sulphur oxides	no data available	Not in this list	Not in this list	Not in this list
For chiral derivatization	(+)-Dibenzyl L-tartrate	Dibenzyl (2S,3S)-2,3-dihydroxysuccinate	622-00-4	C18H18O6	330.33	52.5	441.27	171.5	0	2.35	7.794	-5.444	1.112	0.46	2.74	542	Caution - substance not yet tested completely.	Caution - substance not yet tested completely.	IARC: No component of this product present at levels greater than or equal to 0.1% is identified as probable, possible or confirmed human carcinogen by IARC.	Caution - substance not yet tested completely.	Carbon oxides	no data available	Not in this list	Not in this list	Not in this list
For chiral derivatization	(−)-Noe’s reagent	(1S,2R,4S,6R,7S,1'S,2'R,4'S,6'R,7'S)-4,4'-Oxybis(1,10,10-trimethyl-3-oxatricyclo[5.2.1.02,6]decane	108031-79-4	C24H38O3	374.56	150	391.66	148.7	1.3e-06	5.61	10.8		3.527	3.616	89.52	8020	none	none	IARC: No component of this product present at levels greater than or equal to 0.1% is identified as probable, possible or confirmed human carcinogen by IARC.	none	Carbon oxides	no data available	Not in this list	Not in this list	Not in this list
For chiral derivatization	2,3,4,6-Tetra-O-pivaloyl-β-D-glucopyranosyl isothiocyanate	2,3,4,6-Tetrakis-O-(2,2-dimethylpropanoyl)-N-(thioxomethylene)-β-D-glucopyranosylamine	958300-06-6	C27H43NO9S	557.7	142	572.7	300	0	7.36			5.231	5.155			none	none	IARC: No component of this product present at levels greater than or equal to 0.1% is identified as probable, possible or confirmed human carcinogen by IARC.	none	Carbon oxides, Nitrogen oxides (NOx), Sulphur oxides	no data available	Not in this list	Not in this list	Not in this list
